# Supplementary material for: A clinical audit of changes in suicide ideas with internet treatment for depression
Source: PubMed Central journal article supplement — BMJ Open. 2012 Sep 13;2(5):e001558. doi: 10.1136/bmjopen-2012-001558 (PMC3467611; doi:10.1136/bmjopen-2012-001558), 2012-09-13
Supplement: bmjopen-2012-001558.draft_revisions.pdf [file bmjopen-2012-001558.draft_revisions.pdf]

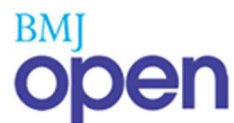

**Reductions in suicidality after internet cognitive behaviour therapy for depression.**

|                                 |                                                                                                                                                                                                                                                                                                                                                                                                |
|---------------------------------|------------------------------------------------------------------------------------------------------------------------------------------------------------------------------------------------------------------------------------------------------------------------------------------------------------------------------------------------------------------------------------------------|
| Journal:                        | <i>BMJ Open</i>                                                                                                                                                                                                                                                                                                                                                                                |
| Manuscript ID:                  | bmjopen-2012-001558                                                                                                                                                                                                                                                                                                                                                                            |
| Article Type:                   | Research                                                                                                                                                                                                                                                                                                                                                                                       |
| Date Submitted by the Author:   | 28-May-2012                                                                                                                                                                                                                                                                                                                                                                                    |
| Complete List of Authors:       | Watts, Sarah; St Vincents Hospital, Clinical Research Unit for Anxiety and Depression<br>Newby, Jill; University of New South Wales, Clinical Research Unit for Anxiety and Depression<br>Mewton, Louise; University of New South Wales, Clinical Research Unit for Anxiety and Depression<br>Andrews, Gavin; University of New South Wales, Clinical Research Unit for Anxiety and Depression |
| <b>Primary Subject Heading</b>: | Evidence based practice                                                                                                                                                                                                                                                                                                                                                                        |
| Secondary Subject Heading:      | Mental health                                                                                                                                                                                                                                                                                                                                                                                  |
| Keywords:                       | MENTAL HEALTH, PRIMARY CARE, PSYCHIATRY, Depression & mood disorders < PSYCHIATRY                                                                                                                                                                                                                                                                                                              |
|                                 |                                                                                                                                                                                                                                                                                                                                                                                                |

SCHOLARONE™  
Manuscripts

1  
2  
3  
4 **Reductions in suicidality after internet cognitive behaviour therapy for depression.**  
5  
6  
7

8 Sarah Watts <sup>1</sup>

9  
10  
11 Jill M. Newby<sup>1</sup>

12  
13 Louise Mewton<sup>1,2</sup>

14  
15  
16  
17 Gavin Andrews <sup>1</sup>  
18  
19  
20  
21

- 22 1. Clinical Research Unit for Anxiety and Depression, School of Psychiatry, University of New  
23 South Wales at St Vincent's Hospital, Darlinghurst, NSW, Australia.  
24  
25 2. Corresponding author.  
26  
27  
28  
29

30 **Competing interests**  
31

32 None declared  
33  
34  
35

36 **Funding**  
37

38 This research received no specific grant from any funding agency in the public, commercial  
39 or not-for-profit sectors  
40  
41  
42  
43  
44  
45  
46  
47  
48  
49  
50  
51  
52  
53  
54  
55  
56  
57  
58  
59  
60

## Abstract

Objectives: To examine reductions in both depressive symptomatology and suicidal ideation amongst a sample of patients who were prescribed an internet CBT course for depression.

Design: Effectiveness study within a quality assurance framework. Setting: Primary care.

Participants: 299 patients who were prescribed an internet CBT course for depression by primary care clinicians. Intervention: 6 lesson, fully automated cognitive behaviour therapy course delivered over the internet. Primary outcome: suicidal ideation as measured by question 9 on the Patient Health Questionnaire (PHQ-9). Results: Suicidal ideation was common (54%) amongst primary care patients prescribed treatment for depression but dropped to 30% post treatment despite minimal clinician contact and the absence of an intervention focused on suicidal ideation. This reduction in suicidal ideation was evident regardless of sex and age. Conclusions: The findings do not support the exclusion of patients with significant suicidal ideation.

## Article summary

### *Article focus*

- The reduction of suicidal ideation amongst patients treated for depression using internet cognitive behaviour therapy in clinical practice

### *Key messages*

- Suicidal ideation is common amongst primary care patients prescribed internet CBT for depression
- After treatment with internet CBT, suicidal ideation decreased significantly
- The continued exclusion of these patients from research studies and internet CBT is no longer justified.

### *Strengths and limitations*

- Evidence is needed to see if the changes in suicidal ideation is sustained over time

1  
2  
3 Patients who say they feel they would be 'better off dead' worry clinicians and, for that  
4 matter, research ethics committees approving depression trials, especially trials over the  
5 internet. As a consequence, patients reporting suicidal ideas are often arbitrarily excluded  
6 from internet treatment trials (1-3). Given that suicidal thoughts are an integral part of  
7 depression we sought data to provide a rational basis for inclusion/exclusion of people with  
8 suicidal ideas.  
9

10  
11  
12  
13  
14 Rates of suicide can be reduced through treatment of depression or reduction in access to the  
15 means for suicide (4-6). The efficacy of cognitive behavioural therapy (CBT) in treating  
16 depression has been established. Suicidal ideas and attempts decrease, commensurate with  
17 reductions in depressive symptomatology (7-15). These studies have all been conducted  
18 within a clinical trial framework amongst depressed patients selected for their high suicide  
19 risk. To our knowledge, there is currently no evidence regarding the effectiveness of CBT or  
20 internet CBT (iCBT) in reducing suicidal ideation in the depressed patient seeking treatment  
21 in primary care, and no data to inform inclusion/exclusion criteria in clinical trials.  
22  
23  
24  
25  
26  
27

28 The aim of the current quality assurance study is to therefore examine reductions in both  
29 depressive symptomatology and suicidal ideation amongst a sample of patients who were  
30 prescribed an internet CBT course for depression by primary care clinicians.  
31  
32  
33

### 34 **Method**

35  
36  
37 *Sample:* Primary care physicians prescribed the internet depression course for patients they  
38 deemed suitable (1). They were advised to exclude people who were 'actively suicidal'. As  
39 part of a routine quality assurance exercise we analysed the progress of the 299 primary care  
40 patients who completed the six lesson iCBT depression course between April 2009 and May  
41 2011 (1). Data gathered was confined to measures used as a routine to inform practitioners  
42 about the progress of their patients. All patients agreed that their pooled data could be used  
43 for quality assurance purposes. This paper was written as part of the Quality Assurance  
44 activities of St Vincent's Hospital with whom the draft of the paper was lodged prior to  
45 submission.  
46  
47  
48  
49  
50  
51

52  
53 *Intervention:* The iCBT depression course consists of six lessons covering psycho-education,  
54 behavioural activation, cognitive restructuring, problem solving, graded exposure and  
55 relapse prevention. Content is presented in the form of an illustrated story in which the  
56 character gains mastery over their depressive symptoms. At the end of each illustrated  
57  
58  
59  
60

1  
2  
3 lesson the patient downloads “homework,” comprising a summary of the lesson content, and  
4 activities to be completed that translate the skills learnt in the lesson to their own lives.

5 Automatic emails are also sent congratulating patients when they complete lessons.

6  
7 Clinicians are advised to contact patients at least twice during the course.

8  
9  
10 *Outcome measures:* The Patient Health Questionnaire (PHQ-9) is a brief 9-item measure of  
11 depression severity (16). The nine items assess DSM-IV Criterion A for major depressive  
12 disorder (MDD). Patients rate each item in terms of the frequency of symptoms over the  
13 past two weeks, on a 4-point scale (0= not at all, 1= several days, 2 = more than half of the  
14 days, 3= nearly every day). Scores can range from 0 to 27, with higher levels representing  
15 higher symptom severity. Cut points for MDD have been established as follows: 0-9 = well  
16 or sub-threshold, 10-14 = mild, 15-19 = moderate, and 20-27 = severe depression (17):

17 Suicidal ideation was measured by question nine from the PHQ-9 which asks about the  
18 frequency of suicidal ideation (“thoughts that you would be better off dead, or of hurting  
19 yourself in some way”) in the previous two weeks using the above 4 point scale.

20  
21  
22 *Statistical Analysis:* Changes in participants’ PHQ-9 scores from pre- to post-treatment were  
23 analysed using a paired samples t-test. Multivariate linear regression controlling for baseline  
24 PHQ-9 scores was used to investigate the effect of sex and age on post-treatment PHQ-9  
25 scores. A Wilcoxon signed-rank test was used to analyse differences in suicidal ideation in  
26 response to treatment. Multinomial logistic regression controlling for baseline suicidality  
27 investigated the effect of sex and age on post-treatment suicidal ideation. An alpha of .05  
28 was used to test statistical significance.

## 29 30 31 32 33 34 35 36 37 38 39 40 41 **Results**

42  
43 *Baseline characteristics:* The mean age of the 299 patients who completed the 6 lesson  
44 course was 43 years, 56% female. The mean baseline PHQ-9 score was 14.3 with 83  
45 patients scoring 0-9 (well or subthreshold MDD), and 216 scoring 10-27 and likely to meet  
46 criteria for MDD ( $n= 72$  mild,  $n= 70$  moderate, and  $n= 74$  severe MDD). Prior to  
47 commencing lesson 1, 54% of the patients (162/299) reported some level of suicidal ideation  
48 on question 9 of the PHQ-9: 30% (91/299) had thought about it for several days in the past  
49 two weeks, 15% (45/299) thought about it more than half the days and 9% (26/299)  
50 indicated that they thought about suicide nearly every day.

1  
2  
3 *Post-treatment outcomes:* From pre- to post-treatment there was a significant reduction in  
4 PHQ-9 scores [ $t(298) = 18.1, p < .001$ ], with PHQ-9 scores reducing by 6.2 points on  
5 average ( $d = 0.98$ ). A multivariate linear regression controlling for baseline PHQ-9 scores  
6 indicated that age and gender were not statistically significant predictors of post-treatment  
7 PHQ-9 scores. The reduction in suicidal ideation was considerable and evident at all  
8 frequencies, with only 30% (90/299) reporting suicidal ideation at lesson 6 (see Figure). A  
9 Wilcoxin signed-rank test showed a statistically significant change in suicidal ideation ( $Z = -$   
10 7.9,  $p < 0.001$ ) as measured by question 9 on the PHQ-9, with median scores of 1 (“several  
11 days”) pre-intervention and 0 (“not at all”) post-intervention. A multinomial logistic  
12 regression controlling for baseline suicidal ideation scores indicated that age and gender  
13 were not statistically significant predictors of post-intervention suicidal ideation scores.  
14 Patient reported a median of 1 (range 0-2) clinician contacts during the course.  
15  
16  
17  
18  
19  
20  
21  
22  
23  
24  
25  
26  
27

<Insert Figure here>

## 28 Discussion

29  
30 Suicidal ideation was common (54%) amongst primary care patients prescribed treatment for  
31 depression but dropped to 30% post treatment despite minimal clinician contact and the  
32 absence of an intervention focused on suicidal ideation. This reduction in suicidal ideation  
33 was evident regardless of sex and age. To our knowledge, this is the first study to show that  
34 an internet CBT course for depression reduces suicidal ideation.  
35  
36  
37  
38

39 The benefits in reducing suicidal ideas are clear. Suicidal behaviour lies on a continuum  
40 from thoughts, through intent and planning, to attempt. In the general population it has been  
41 shown that 34% of people with ideas develop suicidal plans, and that these plans lead to  
42 suicide attempts in 72% of cases (15, 18). That is, 1 in 4 people who report suicidal ideation  
43 will transition to a suicide attempt, most within the first year of ideation onset (18). Suicide  
44 attempts are significant predictors of subsequent completed suicide. Suicidal ideas are  
45 distressing and dangerous, and therefore an important target for treatment.  
46  
47  
48  
49  
50

51  
52 We have conducted two randomised controlled trials of our iCBT program for depression (1,  
53 2). In the first trial, 33% of applicants were excluded due to suicidal ideation. In the second,  
54 23% were excluded due to suicidal ideation. Based on the current results it is now difficult to  
55  
56  
57  
58  
59  
60

1  
2  
3 justify excluding patients from clinical trials on the basis of their high suicidal ideation  
4 scores when internet CBT can reduce them quickly and effectively.  
5  
6

7 *Limitations:* Whilst the item from the PHQ-9 assessed the presence and frequency of suicidal  
8 ideation, it did not assess the intensity of the ideation, controllability, intention to act on  
9 thoughts, nor suicide plans or means. Evidence is also needed to understand whether the  
10 changes in suicidal ideation observed in this study are sustained over time.  
11  
12

13  
14 *Conclusion:* Both suicidal ideation and depressive symptomatology were reduced  
15 considerably following completion of a six lesson iCBT course for depression. This is the  
16 first study to demonstrate these benefits in primary care. At present, it is routine to exclude  
17 patients with frequent suicidal ideation from participating in iCBT. This study provides  
18 evidence for change.  
19  
20  
21  
22  
23

## 24 **Contributors**

25  
26 SW drafted the initial manuscript, prepared and cleaned the data, and conducted initial data  
27 analysis. LM and JN conducted further statistical analysis. GA supervised the trial. All four  
28 authors contributed to revised paper drafts.  
29  
30  
31  
32  
33  
34  
35  
36  
37  
38  
39  
40  
41  
42  
43  
44  
45  
46  
47  
48  
49  
50  
51  
52  
53  
54  
55  
56  
57  
58  
59  
60

## References

1. Perini S, Titov N, Andrews G. Clinician-assisted Internet-based treatment is effective for depression: randomized controlled trial. *Australasian Psychiatry* 2009;43:571-8.
2. Titov N, Andrews G, Davies M, et al. Internet treatment for depression: a randomized controlled trial comparing clinician vs. technician assistance. *PloS one*. 2010;5:e10939.
3. Andersson E, Walén C, Hallberg J, et al. A Randomized Controlled Trial of Guided Internet-delivered Cognitive Behavioral Therapy for Erectile Dysfunction. *The Journal of Sexual Medicine* 2011; 8:2800-9.
4. Kessler RC, Berglund P, Borges G, et al. Trends in suicide ideation, plans, gestures, and attempts in the United States, 1990-1992 to 2001-2003. *JAMA: The Journal of the American Medical Association* 2005;293:2487-95.
5. Goldsmith SK. *Reducing suicide: A national imperative*: Joseph Henry Pr; 2002.
6. Mann JJ, Apter A, Bertolote J, et al. Suicide prevention strategies. *JAMA: The Journal of the American Medical Association* 2005;294:2064-74.
7. Evans K, Tyrer P, Catalan J, et al. Manual-assisted cognitive-behavior therapy (MACT): A randomized controlled trial of a brief intervention with bibliotherapy in the treatment of recurrent deliberate self-harm. *Psychological Medicine* 1999;29:19-25.
8. Hawton K, Bancroft J, Catalan J, et al. Domiciliary and out-patient treatment of self-poisoning patients by medical and non-medical staff. *Psychological Medicine* 1981;11:169-77.
9. Hawton K, Townsend E, Arensman E, et al. Psychosocial and pharmacological treatments for deliberate self harm. *Cochrane Database of Systematic Reviews* 1999;4.
10. Liberman RP, Eckman T. Behavior therapy vs insight-oriented therapy for repeated suicide attempters. *Archives of General Psychiatry* 1981;38:1126-30.
11. McLeavey BC, Daly RJ, Ludgate JW, et al. Interpersonal Problem-Solving Skills Training in the Treatment of Self-Poisoning Patients. *Suicide and Life-Threatening Behavior* 1994;24:382-94.
12. Patsiokas AT, Clum GA. Effects of psychotherapeutic strategies in the treatment of suicide attempters. *Psychotherapy: Theory, Research, Practice, Training*. 1985;22:281-290.
13. Salkovskis PM, Atha C, Storer D. Cognitive-behavioural problem solving in the treatment of patients who repeatedly attempt suicide. A controlled trial. *The British Journal of Psychiatry* 1990;157:871-6.
14. Sande R, Buskens E, Allart E, et al. Psychosocial intervention following suicide attempt: a systematic review of treatment interventions. *Acta Psychiatrica Scandinavica* 1997;96:43-50.
15. Tarrier N, Taylor K, Gooding P. Cognitive-behavioral interventions to reduce suicide behavior. *Behavior Modification* 2008;32:77-108.
16. Kroenke K, Spitzer RL, Williams JBW. The PHQ-9: Validity of a brief depression severity measure. *Journal of General Internal Medicine* 2001;16:606-13.
17. Kroenke K, Spitzer RL, Williams JBW, et al. The Patient Health Questionnaire somatic, anxiety, and depressive symptom scales: a systematic review. *General Hospital Psychiatry* 2010;32:345-59.
18. Kessler RC, Borges G, Walters EE. Prevalence of and risk factors for lifetime suicide attempts in the National Comorbidity Survey. *Archives of General Psychiatry*. 1999;56:617-26.



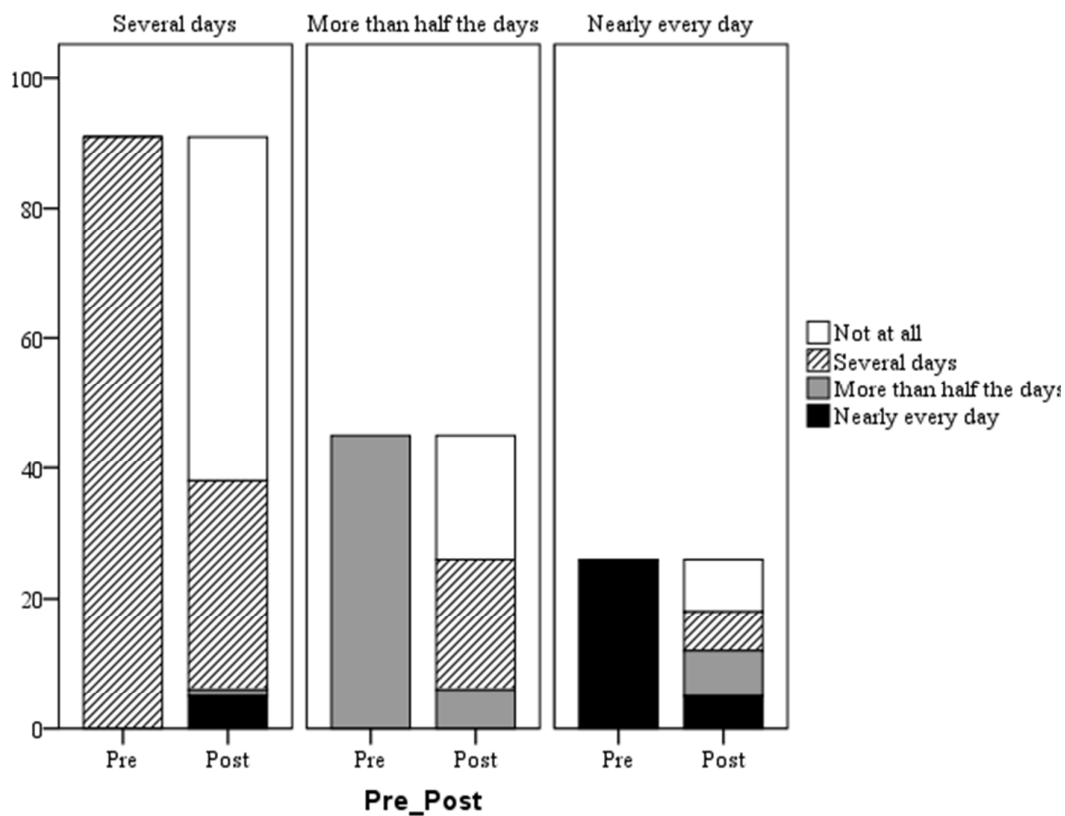

Figure. Frequency of suicidal thoughts (number of patients) before and after treatment for depression.

# Please wait...

If this message is not eventually replaced by the proper contents of the document, your PDF viewer may not be able to display this type of document.

You can upgrade to the latest version of Adobe Reader for Windows®, Mac, or Linux® by visiting [http://www.adobe.com/go/reader\\_download](http://www.adobe.com/go/reader_download).

For more assistance with Adobe Reader visit <http://www.adobe.com/go/acrreader>.

Windows is either a registered trademark or a trademark of Microsoft Corporation in the United States and/or other countries. Mac is a trademark of Apple Inc., registered in the United States and other countries. Linux is the registered trademark of Linus Torvalds in the U.S. and other countries.

# Please wait...

If this message is not eventually replaced by the proper contents of the document, your PDF viewer may not be able to display this type of document.

You can upgrade to the latest version of Adobe Reader for Windows®, Mac, or Linux® by visiting [http://www.adobe.com/go/reader\\_download](http://www.adobe.com/go/reader_download).

For more assistance with Adobe Reader visit <http://www.adobe.com/go/acrreader>.

Windows is either a registered trademark or a trademark of Microsoft Corporation in the United States and/or other countries. Mac is a trademark of Apple Inc., registered in the United States and other countries. Linux is the registered trademark of Linus Torvalds in the U.S. and other countries.

# Please wait...

If this message is not eventually replaced by the proper contents of the document, your PDF viewer may not be able to display this type of document.

You can upgrade to the latest version of Adobe Reader for Windows®, Mac, or Linux® by visiting [http://www.adobe.com/go/reader\\_download](http://www.adobe.com/go/reader_download).

For more assistance with Adobe Reader visit <http://www.adobe.com/go/acrreader>.

Windows is either a registered trademark or a trademark of Microsoft Corporation in the United States and/or other countries. Mac is a trademark of Apple Inc., registered in the United States and other countries. Linux is the registered trademark of Linus Torvalds in the U.S. and other countries.

**SQUIRE Guidelines**  
**(Standards for Quality Improvement Reporting Excellence)**  
**Final revision – 4-29-08**

- These guidelines provide a framework for reporting formal, planned studies designed to assess the nature and effectiveness of interventions to improve the quality and safety of care.
- It may not be possible to include information about every numbered guideline item in reports of original formal studies, but authors should at least consider every item in writing their reports.
- Although each major section (i.e., Introduction, Methods, Results, and Discussion) of a published original study generally contains some information about the numbered items within that section, information about items from one section (for example, the Introduction) is often also needed in other sections (for example, the Discussion).

| <i>Text section; Item number and name</i> | <i>Section or Item description</i>                                                                                                                                                                                                                                                                                                                                                                                |
|-------------------------------------------|-------------------------------------------------------------------------------------------------------------------------------------------------------------------------------------------------------------------------------------------------------------------------------------------------------------------------------------------------------------------------------------------------------------------|
| <b><u>Title and abstract</u></b>          | <i>Did you provide clear and accurate information for finding, indexing, and scanning your paper?</i>                                                                                                                                                                                                                                                                                                             |
| <b>1. Title</b>                           | <ul style="list-style-type: none"> <li>a. Indicates the article concerns the improvement of quality (broadly defined to include the safety, effectiveness, patient-centeredness, timeliness, efficiency, and equity of care)</li> <li>b. States the specific aim of the intervention</li> <li>c. Specifies the study method used (for example, “A qualitative study,” or “A randomized cluster trial”)</li> </ul> |
| <b>2. Abstract</b>                        | Summarizes precisely all key information from various sections of the text using the abstract format of the intended publication                                                                                                                                                                                                                                                                                  |
| <b><u>Introduction</u></b>                | <i>Why did you start?</i>                                                                                                                                                                                                                                                                                                                                                                                         |
| <b>3. Background Knowledge</b>            | Provides a brief, non-selective summary of current knowledge of the care problem being addressed, and characteristics of organizations in which it occurs                                                                                                                                                                                                                                                         |
| <b>4. Local problem</b>                   | Describes the nature and severity of the specific local problem or system dysfunction that was addressed                                                                                                                                                                                                                                                                                                          |
| <b>5. Intended improvement</b>            | <ul style="list-style-type: none"> <li>a. Describes the specific aim (changes/improvements in care processes and patient outcomes) of the proposed intervention</li> <li>b. Specifies who (champions, supporters) and what (events, observations) triggered the decision to make changes, and why now (timing)</li> </ul>                                                                                         |
| <b>6. Study question</b>                  | States precisely the primary improvement-related question and any secondary questions that the study of the intervention was designed to answer                                                                                                                                                                                                                                                                   |
| <b><u>Methods</u></b>                     | <i>What did you do?</i>                                                                                                                                                                                                                                                                                                                                                                                           |
| <b>7. Ethical issues</b>                  | Describes ethical aspects of implementing and studying the improvement, such as privacy concerns, protection of participants’ physical well-being, and potential author conflicts of interest, and how ethical concerns were addressed                                                                                                                                                                            |
| <b>8. Setting</b>                         | Specifies how elements of the local care environment considered most likely to influence change/improvement in the involved site or sites were identified and characterized                                                                                                                                                                                                                                       |
| <b>9. Planning the intervention</b>       | <ul style="list-style-type: none"> <li>a. Describes the intervention and its component parts in sufficient detail that others could reproduce it</li> <li>b. Indicates main factors that contributed to choice of the specific intervention (for example, analysis of causes of dysfunction; matching relevant improvement experience of others with the local situation)</li> </ul>                              |

| <b><i>Text section; Item number and name</i></b>  | <b><i>Section or Item description</i></b>                                                                                                                                                                                                                                                                                                                                                                                                                                                                                                                                                                                                                                                                                                                                                                                                                                                                                                                                                                                                                                                                                                                                                     |
|---------------------------------------------------|-----------------------------------------------------------------------------------------------------------------------------------------------------------------------------------------------------------------------------------------------------------------------------------------------------------------------------------------------------------------------------------------------------------------------------------------------------------------------------------------------------------------------------------------------------------------------------------------------------------------------------------------------------------------------------------------------------------------------------------------------------------------------------------------------------------------------------------------------------------------------------------------------------------------------------------------------------------------------------------------------------------------------------------------------------------------------------------------------------------------------------------------------------------------------------------------------|
| <b>Planning the intervention (continued)</b>      | c. Outlines initial plans for how the intervention was to be implemented: e.g., <i>what</i> was to be done (initial steps; functions to be accomplished by those steps; how tests of change would be used to modify intervention), and <i>by whom</i> (intended roles, qualifications, and training of staff)                                                                                                                                                                                                                                                                                                                                                                                                                                                                                                                                                                                                                                                                                                                                                                                                                                                                                 |
| <b>10. Planning the study of the intervention</b> | a. Outlines plans for assessing how well the intervention was implemented (dose or intensity of exposure)<br>b. Describes mechanisms by which intervention components were expected to cause changes, and plans for testing whether those mechanisms were effective<br>c. Identifies the study design (for example, observational, quasi-experimental, experimental) chosen for measuring impact of the intervention on primary and secondary outcomes, if applicable<br>d. Explains plans for implementing essential aspects of the chosen study design, as described in publication guidelines for specific designs, if applicable (see, for example, <a href="http://www.equator-network.org">www.equator-network.org</a> )<br>e. Describes aspects of the study design that specifically concerned internal validity (integrity of the data) and external validity (generalizability)                                                                                                                                                                                                                                                                                                     |
| <b>11. Methods of evaluation</b>                  | a. Describes instruments and procedures (qualitative, quantitative, or mixed) used to assess a) the effectiveness of implementation, b) the contributions of intervention components and context factors to effectiveness of the intervention, and c) primary and secondary outcomes<br>b. Reports efforts to validate and test reliability of assessment instruments<br>c. Explains methods used to assure data quality and adequacy (for example, blinding; repeating measurements and data extraction; training in data collection; collection of sufficient baseline measurements)                                                                                                                                                                                                                                                                                                                                                                                                                                                                                                                                                                                                        |
| <b>12. Analysis</b>                               | a. Provides details of qualitative and quantitative (statistical) methods used to draw inferences from the data<br>b. Aligns unit of analysis with level at which the intervention was implemented, if applicable<br>c. Specifies degree of variability expected in implementation, change expected in primary outcome (effect size), and ability of study design (including size) to detect such effects<br>d. Describes analytic methods used to demonstrate effects of time as a variable (for example, statistical process control)                                                                                                                                                                                                                                                                                                                                                                                                                                                                                                                                                                                                                                                       |
| <b>Results</b>                                    | <i>What did you find?</i>                                                                                                                                                                                                                                                                                                                                                                                                                                                                                                                                                                                                                                                                                                                                                                                                                                                                                                                                                                                                                                                                                                                                                                     |
| <b>13. Outcomes</b>                               | a) Nature of setting and improvement intervention<br>i. Characterizes relevant elements of setting or settings (for example, geography, physical resources, organizational culture, history of change efforts), and structures and patterns of care (for example, staffing, leadership) that provided context for the intervention<br>ii. Explains the actual course of the intervention (for example, sequence of steps, events or phases; type and number of participants at key points), preferably using a time-line diagram or flow chart<br>iii. Documents degree of success in implementing intervention components<br>iv. Describes how and why the initial plan evolved, and the most important lessons learned from that evolution, particularly the effects of internal feedback from tests of change (reflexiveness)<br>b) Changes in processes of care and patient outcomes associated with the intervention<br>i. Presents data on changes observed in the care delivery process<br>ii. Presents data on changes observed in measures of patient outcome (for example, morbidity, mortality, function, patient/staff satisfaction, service utilization, cost, care disparities) |

| <b><i>Text section; Item number and name</i></b> | <b><i>Section or Item description</i></b>                                                                                                                                                                                                                                                                                                                                                                                                                                                                                                                                                                                                                                                                                                                                                                                              |
|--------------------------------------------------|----------------------------------------------------------------------------------------------------------------------------------------------------------------------------------------------------------------------------------------------------------------------------------------------------------------------------------------------------------------------------------------------------------------------------------------------------------------------------------------------------------------------------------------------------------------------------------------------------------------------------------------------------------------------------------------------------------------------------------------------------------------------------------------------------------------------------------------|
| <b>Outcomes (continued)</b>                      | <ul style="list-style-type: none"> <li>iii. Considers benefits, harms, unexpected results, problems, failures</li> <li>iv. Presents evidence regarding the strength of association between observed changes/improvements and intervention components/context factors</li> <li>v. Includes summary of missing data for intervention and outcomes</li> </ul>                                                                                                                                                                                                                                                                                                                                                                                                                                                                             |
| <b><u>Discussion</u></b>                         | <i>What do the findings mean?</i>                                                                                                                                                                                                                                                                                                                                                                                                                                                                                                                                                                                                                                                                                                                                                                                                      |
| <b>14. Summary</b>                               | <ul style="list-style-type: none"> <li>a. Summarizes the most important successes and difficulties in implementing intervention components, and main changes observed in care delivery and clinical outcomes</li> <li>b. Highlights the study's particular strengths</li> </ul>                                                                                                                                                                                                                                                                                                                                                                                                                                                                                                                                                        |
| <b>15. Relation to other evidence</b>            | Compares and contrasts study results with relevant findings of others, drawing on broad review of the literature; use of a summary table may be helpful in building on existing evidence                                                                                                                                                                                                                                                                                                                                                                                                                                                                                                                                                                                                                                               |
| <b>16. Limitations</b>                           | <ul style="list-style-type: none"> <li>a. Considers possible sources of confounding, bias, or imprecision in design, measurement, and analysis that might have affected study outcomes (internal validity)</li> <li>b. Explores factors that could affect generalizability (external validity), for example: representativeness of participants; effectiveness of implementation; dose-response effects; features of local care setting</li> <li>c. Addresses likelihood that observed gains may weaken over time, and describes plans, if any, for monitoring and maintaining improvement; explicitly states if such planning was not done</li> <li>d. Reviews efforts made to minimize and adjust for study limitations</li> <li>e. Assesses the effect of study limitations on interpretation and application of results</li> </ul> |
| <b>17. Interpretation</b>                        | <ul style="list-style-type: none"> <li>a. Explores possible reasons for differences between observed and expected outcomes</li> <li>b. Draws inferences consistent with the strength of the data about causal mechanisms and size of observed changes, paying particular attention to components of the intervention and context factors that helped determine the intervention's effectiveness (or lack thereof), and types of settings in which this intervention is most likely to be effective</li> <li>c. Suggests steps that might be modified to improve future performance</li> <li>d. Reviews issues of opportunity cost and actual financial cost of the intervention</li> </ul>                                                                                                                                             |
| <b>18. Conclusions</b>                           | <ul style="list-style-type: none"> <li>a. Considers overall practical usefulness of the intervention</li> <li>b. Suggests implications of this report for further studies of improvement interventions</li> </ul>                                                                                                                                                                                                                                                                                                                                                                                                                                                                                                                                                                                                                      |
| <b><u>Other information</u></b>                  | <i>Were other factors relevant to conduct and interpretation of the study?</i>                                                                                                                                                                                                                                                                                                                                                                                                                                                                                                                                                                                                                                                                                                                                                         |
| <b>19. Funding</b>                               | Describes funding sources, if any, and role of funding organization in design, implementation, interpretation, and publication of study                                                                                                                                                                                                                                                                                                                                                                                                                                                                                                                                                                                                                                                                                                |

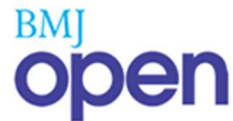

**Reductions in suicidality after internet cognitive behaviour therapy for depression.**

|                                 |                                                                                                                                                                                                                                                                                                                                                                                                |
|---------------------------------|------------------------------------------------------------------------------------------------------------------------------------------------------------------------------------------------------------------------------------------------------------------------------------------------------------------------------------------------------------------------------------------------|
| Journal:                        | <i>BMJ Open</i>                                                                                                                                                                                                                                                                                                                                                                                |
| Manuscript ID:                  | bmjopen-2012-001558.R1                                                                                                                                                                                                                                                                                                                                                                         |
| Article Type:                   | Research                                                                                                                                                                                                                                                                                                                                                                                       |
| Date Submitted by the Author:   | 19-Jul-2012                                                                                                                                                                                                                                                                                                                                                                                    |
| Complete List of Authors:       | Watts, Sarah; St Vincents Hospital, Clinical Research Unit for Anxiety and Depression<br>Newby, Jill; University of New South Wales, Clinical Research Unit for Anxiety and Depression<br>Mewton, Louise; University of New South Wales, Clinical Research Unit for Anxiety and Depression<br>Andrews, Gavin; University of New South Wales, Clinical Research Unit for Anxiety and Depression |
| <b>Primary Subject Heading</b>: | Evidence based practice                                                                                                                                                                                                                                                                                                                                                                        |
| Secondary Subject Heading:      | Mental health                                                                                                                                                                                                                                                                                                                                                                                  |
| Keywords:                       | MENTAL HEALTH, PRIMARY CARE, PSYCHIATRY, Depression & mood disorders < PSYCHIATRY                                                                                                                                                                                                                                                                                                              |
|                                 |                                                                                                                                                                                                                                                                                                                                                                                                |

SCHOLARONE™  
Manuscripts



**Reductions in suicidality after internet cognitive behaviour therapy for depression.**Sarah Watts<sup>1</sup>Jill M. Newby<sup>1</sup>Louise Mewton<sup>1,2</sup>Gavin Andrews<sup>1</sup>

1. Clinical Research Unit for Anxiety and Depression, School of Psychiatry, University of New South Wales at St Vincent's Hospital, Darlinghurst, NSW, Australia.
2. Corresponding author.

**Competing interests**

None declared

**Funding**

Ms Watts and Dr Newby were supported by the Australian Government Department of Health and Ageing. Dr Mewton was supported by an Australian National Health and Medical Research Council Capacity Building Grant.

## Abstract

Objectives: To examine reductions in suicidal ideation amongst a sample of patients who were prescribed an internet CBT course for depression. Design: Effectiveness study within a quality assurance framework. Setting: Primary care. Participants: 299 patients who were prescribed an internet CBT (iCBT) course for depression by primary care clinicians.

Intervention: 6 lesson, fully automated cognitive behaviour therapy course delivered over the internet. Primary outcome: suicidal ideation as measured by question 9 on the Patient Health Questionnaire (PHQ-9). Results: Suicidal ideation was common (54%) amongst primary care patients prescribed iCBT treatment for depression but dropped to 30% post treatment despite minimal clinician contact and the absence of an intervention focused on suicidal ideation.

This reduction in suicidal ideation was evident regardless of sex and age. Conclusions: The findings do not support the exclusion of patients with significant suicidal ideation.

## Article summary

### *Article focus*

- The reduction of suicidal ideation amongst patients treated for depression using internet cognitive behaviour therapy in clinical practice

### *Key messages*

- Suicidal ideation is common amongst primary care patients prescribed internet CBT for depression
- After treatment with internet CBT, suicidal ideation decreased significantly
- The continued exclusion of these patients from research studies and internet CBT is no longer justified.

### *Strengths and limitations*

- Evidence is needed to see if the changes in suicidal ideation is sustained over time

1  
2  
3 Patients who say they feel they would be 'better off dead' worry clinicians and, for that  
4 matter, research ethics committees approving depression trials, especially trials over the  
5 internet. As a consequence, patients reporting suicidal ideas are often excluded from internet  
6 treatment trials (1-3). Given that suicidal thoughts are an integral part of depression we  
7 sought data to provide a rational basis for inclusion/exclusion of people with suicidal ideas.  
8  
9

10  
11  
12 Rates of suicide can be reduced through treatment of depression or reduction in access to the  
13 means for suicide (4-6). The efficacy of cognitive behavioural therapy (CBT) in treating  
14 depression has been established. Suicidal ideas and attempts decrease, commensurate with  
15 reductions in depressive symptomatology (7-15). These studies have all been conducted  
16 within a clinical trial framework amongst depressed patients selected for their high suicide  
17 risk. To our knowledge, there is currently no evidence regarding the effectiveness of CBT or  
18 internet CBT (iCBT) in reducing suicidal ideation in the depressed patient seeking treatment  
19 in primary care, and no data to inform inclusion/exclusion criteria in clinical trials.  
20  
21

22  
23  
24 We have previously reported from two randomized controlled trials that the progress of  
25 patients receiving the internet CBT course used in this study was significantly better than the  
26 progress of a waitlist control group (1, 2). We have also reported from quality assurance  
27 studies that when these courses were used routinely by primary care clinicians that  
28 effectiveness was comparable to the efficacy and that adherence rates of 60% could be  
29 achieved (16, 17). The aim of the current quality assurance study is to examine reductions in  
30 suicidal ideation amongst a sample of patients who were prescribed an internet CBT course  
31 for depression by primary care clinicians.  
32  
33  
34  
35  
36  
37  
38  
39

## 40 **Method**

41  
42  
43 *Sample:* Primary care physicians prescribed the internet depression course for patients they  
44 deemed suitable (1). They were advised to exclude people who were 'actively suicidal'. As  
45 part of a routine quality assurance exercise we analysed the progress of the 299 primary care  
46 patients who completed the six lesson iCBT depression course between April 2009 and May  
47 2011 (1). Data gathered was confined to measures used as a routine to inform practitioners  
48 about the progress of their patients. All patients agreed that their pooled data could be used  
49 for quality assurance purposes. This paper was written as part of the Quality Assurance  
50 activities of St Vincent's Hospital with whom the draft of the paper was lodged prior to  
51 submission.  
52  
53  
54  
55  
56  
57  
58  
59  
60

1  
2  
3 *Intervention:* The iCBT depression course consists of six lessons covering psycho-education,  
4 behavioural activation, cognitive restructuring, problem solving, graded exposure and  
5 relapse prevention (1, 2). Content is presented in the form of an illustrated story in which the  
6 character gains mastery over their depressive symptoms. At the end of each illustrated  
7 lesson the patient downloads “homework,” comprising a summary of the lesson content, and  
8 activities to be completed that translate the skills learnt in the lesson to their own lives.  
9 Automatic emails are also sent congratulating patients when they complete lessons.  
10 Clinicians are advised to contact patients at least twice during the course.  
11  
12  
13  
14  
15  
16

17 *Outcome measures:* The Patient Health Questionnaire (PHQ-9) is a brief 9-item measure of  
18 depression severity (18). The nine items assess DSM-IV Criterion A for major depressive  
19 disorder (MDD). Patients rate each item in terms of the frequency of symptoms over the  
20 past two weeks, on a 4-point scale (0= not at all, 1= several days, 2 = more than half of the  
21 days, 3= nearly every day). Scores can range from 0 to 27, with higher levels representing  
22 higher symptom severity. Cut points for MDD have been established as follows: 0-9 = well  
23 or sub-threshold, 10-14 = mild, 15-19 = moderate, and 20-27 = severe depression (19).  
24 Suicidal ideation was measured by question nine from the PHQ-9 which asks about the  
25 frequency of suicidal ideation (“thoughts that you would be better off dead, or of hurting  
26 yourself in some way”) in the previous two weeks using the above 4 point scale. The PHQ-9  
27 has been shown to demonstrate adequate reliability, convergent/discriminant validity, and  
28 responsiveness to change in previous studies of iCBT (20), with a Cronbach’s alpha of 0.89  
29 in the current sample.  
30  
31  
32  
33  
34  
35  
36  
37  
38  
39

40 *Statistical Analysis:* Changes in participants’ PHQ-9 scores from pre- to post-treatment were  
41 analysed using a paired samples t-test. Multivariate linear regression controlling for baseline  
42 PHQ-9 scores was used to investigate the effect of sex and age on post-treatment PHQ-9  
43 scores. A Wilcoxon signed-rank test was used to analyse differences in suicidal ideation in  
44 response to treatment. Multinomial logistic regression controlling for baseline suicidality  
45 investigated the effect of sex and age on post-treatment suicidal ideation. An alpha of .05  
46 was used to test statistical significance.  
47  
48  
49  
50  
51

## 52 **Results**

53 *Baseline characteristics:* The mean age of the 299 patients who completed the 6 lesson  
54 course was 43 years, 56% female. The mean baseline PHQ-9 score was 14.3 with 83  
55  
56  
57  
58  
59  
60

1  
2  
3 patients scoring 0-9 (well or subthreshold MDD), and 216 scoring 10-27 and likely to meet  
4 criteria for MDD ( $n= 72$  mild,  $n= 70$  moderate, and  $n= 74$  severe MDD). Prior to  
5 commencing lesson 1, 54% of the patients (162/299) reported some level of suicidal ideation  
6 on question 9 of the PHQ-9: 30% (91/299) had thought about it for several days in the past  
7 two weeks, 15% (45/299) thought about it more than half the days and 9% (26/299)  
8 indicated that they thought about suicide nearly every day.  
9  
10  
11  
12

13  
14 *Post-treatment outcomes:* From pre- to post-treatment there was a significant reduction in  
15 PHQ-9 scores [ $t(298) = 18.1, p < .001$ ], with PHQ-9 scores reducing by 6.2 points on  
16 average [S.D. = 5.9;  $d = 0.98$  (95% CI: )]. A multivariate linear regression controlling for  
17 baseline PHQ-9 scores indicated that age and gender were not statistically significant  
18 predictors of post-treatment PHQ-9 scores. The reduction in suicidal ideation was  
19 considerable and evident at all frequencies, with only 30% (90/299) reporting suicidal  
20 ideation at lesson 6 (see Figure). A Wilcoxin signed-rank test showed a statistically  
21 significant change in suicidal ideation ( $Z= -7.9, p < 0.001, r = 0.5$ ) as measured by question 9  
22 on the PHQ-9, with median scores of 1 (“several days”) pre-intervention and 0 (“not at all”)  
23 post-intervention. A multinomial logistic regression controlling for baseline suicidal ideation  
24 scores indicated that age and gender were not statistically significant predictors of post-  
25 intervention suicidal ideation scores. Patient reported a median of 1 (range 0-2) clinician  
26 contacts during the course.  
27  
28  
29  
30  
31  
32  
33  
34  
35  
36

37 <Insert Table and Figure here>  
38  
39

## 40 Discussion

41  
42 Suicidal ideation was common (54%) amongst primary care patients prescribed treatment for  
43 depression but dropped to 30% post treatment despite minimal clinician contact and the  
44 absence of an intervention focused on suicidal ideation. This reduction in suicidal ideation  
45 was evident regardless of sex and age. To our knowledge, this is the first study to show that  
46 an internet CBT course for depression reduces suicidal ideation.  
47  
48  
49  
50

51  
52 The benefits in reducing suicidal ideas are clear. Suicidal behaviour lies on a continuum  
53 from thoughts, through intent and planning, to attempt. In the general population it has been  
54 shown that 34% of people with ideas develop suicidal plans, and that these plans lead to  
55 suicide attempts in 72% of cases (15, 21). That is, 1 in 4 people who report suicidal ideation  
56  
57  
58  
59  
60

1  
2  
3 will transition to a suicide attempt, most within the first year of ideation onset (21). Suicide  
4 attempts are significant predictors of subsequent completed suicide. Suicidal ideas are  
5 distressing and dangerous, and therefore an important target for treatment.  
6  
7

8  
9  
10 We have conducted two randomised controlled trials of our iCBT program for depression (1,  
11 2). In the first trial, 33% of applicants were excluded due to suicidal ideation. In the second,  
12 23% were excluded due to suicidal ideation. Based on the current results it is now difficult to  
13 justify excluding patients from clinical trials on the basis of their high suicidal ideation  
14 scores when internet CBT can reduce them quickly and effectively.  
15  
16  
17

18  
19 *Limitations:* Whilst the item from the PHQ-9 assessed the presence and frequency of suicidal  
20 ideation, it did not assess the intensity of the ideation, controllability, intention to act on  
21 thoughts, nor suicide plans or means. Evidence is also needed to understand whether the  
22 changes in suicidal ideation observed in this study are sustained over time. In addition, there  
23 was no control sample, meaning that treatment effects could be attributable to regression to  
24 the mean, spontaneous remission or placebo effects, rather than the intervention *per se*. The  
25 fact that benefits were observed amongst patients at different levels of baseline risk indicates  
26 that regression to the mean may not underlie treatment effects. However, it is not possible to  
27 fully examine the influence of these alternative factors on the outcomes of interest. It was  
28 also not possible to establish whether treatment effects were sustained over time due to the  
29 lack of follow up data. Finally, the lack of formal exclusion criteria means that patients may  
30 have been using adjunctive treatments which contributed to the magnitude of treatment  
31 effects. Whilst the limitations outlined above may be critical within the context of an  
32 efficacy trial, they are endemic to effectiveness research.  
33  
34  
35  
36  
37  
38  
39  
40  
41  
42

43  
44 *Conclusion:* Both suicidal ideation and depressive symptomatology were reduced  
45 considerably following completion of a six lesson iCBT course for depression. This is the  
46 first study to demonstrate these benefits in primary care. At present, it is routine to exclude  
47 patients with frequent suicidal ideation from participating in iCBT. This study provides  
48 evidence for change.  
49  
50  
51  
52  
53  
54  
55  
56  
57  
58  
59  
60

1  
2  
3  
4  
5  
6  
7  
8  
9  
10  
11  
12  
13  
14  
15  
16  
17  
18  
19  
20  
21  
22  
23  
24  
25  
26  
27  
28  
29  
30  
31  
32  
33  
34  
35  
36  
37  
38  
39  
40  
41  
42  
43  
44  
45  
46  
47  
48  
49  
50  
51  
52  
53  
54  
55  
56  
57  
58  
59  
60

**Contributors**

SW drafted the initial manuscript, prepared and cleaned the data, and conducted initial data analysis. LM and JN conducted further statistical analysis. GA supervised and took responsibility for the data. All four authors contributed to revised drafts.

For peer review only

## References

1. Perini S, Titov N, Andrews G. Clinician-assisted Internet-based treatment is effective for depression: randomized controlled trial. *Australasian Psychiatry*. 2009;43(6):571-8.
2. Titov N, Andrews G, Davies M, et al. Internet treatment for depression: a randomized controlled trial comparing clinician vs. technician assistance. *PloS one*. 2010;5(6):e10939.
3. Johansson R, Sjöberg E, Sjögren M, et al. Tailored vs. Standardized Internet-Based Cognitive Behavior Therapy for Depression and Comorbid Symptoms: A Randomized Controlled Trial. *PloS one*. 2012;7(5):e36905.
4. Kessler RC, Berglund P, Borges G, et al. Trends in suicide ideation, plans, gestures, and attempts in the United States, 1990-1992 to 2001-2003. *JAMA: The Journal of the American Medical Association*. 2005;293(20):2487-95.
5. Goldsmith SK. Reducing suicide: A national imperative: Joseph Henry Pr; 2002.
6. Mann JJ, Apter A, Bertolote J, et al. Suicide prevention strategies. *JAMA: The Journal of the American Medical Association*. 2005;294(16):2064-74.
7. Evans K, Tyrer P, Catalan J, et al. Manual-assisted cognitive-behavior therapy (MACT): A randomized controlled trial of a brief intervention with bibliotherapy in the treatment of recurrent deliberate self-harm. *Psychological Medicine*. 1999;29(19-25).
8. Hawton K, Bancroft J, Catalan J, et al. Domiciliary and out-patient treatment of self-poisoning patients by medical and non-medical staff. *Psychological medicine*. 1981;11(01):169-77.
9. Hawton K, Townsend E, Arensman E, et al. Psychosocial and pharmacological treatments for deliberate self harm. *Cochrane Database of Systematic Reviews*. 1999;4.
10. Liberman RP, Eckman T. Behavior therapy vs insight-oriented therapy for repeated suicide attempters. *Archives of general psychiatry*. 1981;38(10):1126.
11. McLeavey BC, Daly RJ, Ludgate JW, et al. Interpersonal Problem-Solving Skills Training in the Treatment of Self-Poisoning Patients. *Suicide and Life-Threatening Behavior*. 1994;24(4):382-94.
12. Patsiokas AT, Clum GA. Effects of psychotherapeutic strategies in the treatment of suicide attempters. *Psychotherapy: Theory, Research, Practice, Training*. 1985;22(2):281.
13. Salkovskis PM, Atha C, Storer D. Cognitive-behavioural problem solving in the treatment of patients who repeatedly attempt suicide. A controlled trial. *The British Journal of Psychiatry*. 1990;157(6):871-6.
14. Sande R, Buskens E, Allart E, et al. Psychosocial intervention following suicide attempt: a systematic review of treatment interventions. *Acta psychiatrica scandinavica*. 1997;96(1):43-50.
15. TARRIER N, Taylor K, Gooding P. Cognitive-behavioral interventions to reduce suicide behavior. *Behavior Modification*. 2008;32(1):77-108.
16. Sunderland M, Wong N, Hilvert-Bruce Z, et al. Investigating trajectories of change in psychological distress amongst patients with depression and generalised anxiety disorder treated with internet cognitive behavioural therapy. *Behaviour Research and Therapy*. 2012.
17. Hilvert-Bruce Z, Rossouw PJ, Wong N, et al. Adherence as a determinant of effectiveness of internet cognitive behavioural therapy for anxiety and depressive disorders. *Behaviour Research and Therapy*. 2012.
18. Kroenke K, Spitzer RL, Williams JBW. The PHQ-9: Validity of a brief depression severity measure. *Journal of General Internal Medicine*. 2001;16(9):606-13.
19. Kroenke K, Spitzer RL, Williams JBW, et al. The Patient Health Questionnaire somatic, anxiety, and depressive symptom scales: a systematic review. *General Hospital Psychiatry*. 2010;32(4):345-59.



1  
2  
3  
4  
5  
6  
7  
8  
9  
10  
11  
12  
13  
14  
15  
16  
17  
18  
19  
20  
21  
22  
23  
24  
25  
26  
27  
28  
29  
30  
31  
32  
33  
34  
35  
36  
37  
38  
39  
40  
41  
42  
43  
44  
45  
46  
47  
48  
49  
50  
51  
52  
53  
54  
55  
56  
57  
58  
59  
60

20. Titov N, Dear BF, McMillan D, et al. Psychometric Comparison of the PHQ-9 and BDI-II for Measuring Response during Treatment of Depression. *Cognitive Behaviour Therapy*. 2011;40(2):126-36.

21. Kessler RC, Borges G, Walters EE. Prevalence of and risk factors for lifetime suicide attempts in the National Comorbidity Survey. *Archives of general psychiatry*. 1999;56(7):617.

For peer review only

**Reductions in suicidality after internet cognitive behaviour therapy for depression.**Sarah Watts<sup>1</sup>Jill M. Newby<sup>1</sup>Louise Mewton<sup>1,2</sup>Gavin Andrews<sup>1</sup>

1. Clinical Research Unit for Anxiety and Depression, School of Psychiatry, University of New South Wales at St Vincent's Hospital, Darlinghurst, NSW, Australia.
2. Corresponding author.

**Competing interests**

None declared

**Funding**

Ms Watts and Dr Newby were supported by the Australian Government Department of Health and Ageing. Dr Mewton was supported by an Australian National Health and Medical Research Council Capacity Building Grant.

## Abstract

Objectives: To examine reductions in suicidal ideation amongst a sample of patients who were prescribed an internet CBT course for depression. Design: Effectiveness study within a quality assurance framework. Setting: Primary care. Participants: 299 patients who were prescribed an internet CBT (iCBT) course for depression by primary care clinicians.

Intervention: 6 lesson, fully automated cognitive behaviour therapy course delivered over the internet. Primary outcome: suicidal ideation as measured by question 9 on the Patient Health Questionnaire (PHQ-9). Results: Suicidal ideation was common (54%) amongst primary care patients prescribed iCBT treatment for depression but dropped to 30% post treatment despite minimal clinician contact and the absence of an intervention focused on suicidal ideation.

This reduction in suicidal ideation was evident regardless of sex and age. Conclusions: The findings do not support the exclusion of patients with significant suicidal ideation.

## Article summary

### *Article focus*

- The reduction of suicidal ideation amongst patients treated for depression using internet cognitive behaviour therapy in clinical practice

### *Key messages*

- Suicidal ideation is common amongst primary care patients prescribed internet CBT for depression
- After treatment with internet CBT, suicidal ideation decreased significantly
- The continued exclusion of these patients from research studies and internet CBT is no longer justified.

### *Strengths and limitations*

- Evidence is needed to see if the changes in suicidal ideation is sustained over time

1  
2  
3 Patients who say they feel they would be 'better off dead' worry clinicians and, for that  
4 matter, research ethics committees approving depression trials, especially trials over the  
5 internet. As a consequence, patients reporting suicidal ideas are often ~~arbitrarily~~-excluded  
6 from internet treatment trials (1-3). Given that suicidal thoughts are an integral part of  
7 depression we sought data to provide a rational basis for inclusion/exclusion of people with  
8 suicidal ideas.  
9

10  
11  
12  
13  
14 Rates of suicide can be reduced through treatment of depression or reduction in access to the  
15 means for suicide (4-6). The efficacy of cognitive behavioural therapy (CBT) in treating  
16 depression has been established. Suicidal ideas and attempts decrease, commensurate with  
17 reductions in depressive symptomatology (7-15). These studies have all been conducted  
18 within a clinical trial framework amongst depressed patients selected for their high suicide  
19 risk. To our knowledge, there is currently no evidence regarding the effectiveness of CBT or  
20 internet CBT (iCBT) in reducing suicidal ideation in the depressed patient seeking treatment  
21 in primary care, and no data to inform inclusion/exclusion criteria in clinical trials.  
22  
23  
24  
25  
26  
27

28 We have previously reported from two randomized controlled trials that the progress of  
29 patients receiving the internet CBT course used in this study was significantly better than the  
30 progress of a waitlist control group (1, 2). We have also reported from quality assurance  
31 studies that when these courses were used routinely by primary care clinicians that  
32 effectiveness was comparable to the efficacy and that adherence rates of 60% could be  
33 achieved (16, 17). The aim of the current quality assurance study is to ~~therefore~~ examine  
34 reductions in suicidal ideation amongst a sample of patients who were prescribed an internet  
35 CBT course for depression by primary care clinicians.  
36  
37  
38  
39  
40  
41

## 42 **Method**

43  
44  
45 *Sample:* Primary care physicians prescribed the internet depression course for patients they  
46 deemed suitable (1). They were advised to exclude people who were 'actively suicidal'. As  
47 part of a routine quality assurance exercise we analysed the progress of the 299 primary care  
48 patients who completed the six lesson iCBT depression course between April 2009 and May  
49 2011 (1). Data gathered was confined to measures used as a routine to inform practitioners  
50 about the progress of their patients. All patients agreed that their pooled data could be used  
51 for quality assurance purposes. This paper was written as part of the Quality Assurance  
52  
53  
54  
55  
56  
57  
58  
59  
60

1  
2  
3 activities of St Vincent's Hospital with whom the draft of the paper was lodged prior to  
4 submission.  
5

6  
7 *Intervention:* The iCBT depression course consists of six lessons covering psycho-education,  
8 behavioural activation, cognitive restructuring, problem solving, graded exposure and  
9 relapse prevention (1, 2). Content is presented in the form of an illustrated story in which the  
10 character gains mastery over their depressive symptoms. At the end of each illustrated  
11 lesson the patient downloads "homework," comprising a summary of the lesson content, and  
12 activities to be completed that translate the skills learnt in the lesson to their own lives.  
13 Automatic emails are also sent congratulating patients when they complete lessons.  
14 Clinicians are advised to contact patients at least twice during the course.  
15  
16  
17  
18  
19

20  
21 *Outcome measures:* The Patient Health Questionnaire (PHQ-9) is a brief 9-item measure of  
22 depression severity (18). The nine items assess DSM-IV Criterion A for major depressive  
23 disorder (MDD). Patients rate each item in terms of the frequency of symptoms over the  
24 past two weeks, on a 4-point scale (0= not at all, 1= several days, 2 = more than half of the  
25 days, 3= nearly every day). Scores can range from 0 to 27, with higher levels representing  
26 higher symptom severity. Cut points for MDD have been established as follows: 0-9 = well  
27 or sub-threshold, 10-14 = mild, 15-19 = moderate, and 20-27 = severe depression (19).  
28 Suicidal ideation was measured by question nine from the PHQ-9 which asks about the  
29 frequency of suicidal ideation ("thoughts that you would be better off dead, or of hurting  
30 yourself in some way") in the previous two weeks using the above 4 point scale. The PHQ-9  
31 has been shown to demonstrate adequate reliability, convergent/discriminant validity, and  
32 responsiveness to change in previous studies of iCBT (20), with a Cronbach's alpha of 0.89  
33 in the current sample.  
34  
35  
36  
37  
38  
39  
40  
41  
42  
43

44 *Statistical Analysis:* Changes in participants' PHQ-9 scores from pre- to post-treatment were  
45 analysed using a paired samples t-test. Multivariate linear regression controlling for baseline  
46 PHQ-9 scores was used to investigate the effect of sex and age on post-treatment PHQ-9  
47 scores. A Wilcoxon signed-rank test was used to analyse differences in suicidal ideation in  
48 response to treatment. Multinomial logistic regression controlling for baseline suicidality  
49 investigated the effect of sex and age on post-treatment suicidal ideation. An alpha of .05  
50 was used to test statistical significance.  
51  
52  
53  
54  
55

## 56 57 **Results** 58 59 60

1  
2  
3 *Baseline characteristics:* The mean age of the 299 patients who completed the 6 lesson  
4 course was 43 years, 56% female. The mean baseline PHQ-9 score was 14.3 with 83  
5 patients scoring 0-9 (well or subthreshold MDD), and 216 scoring 10-27 and likely to meet  
6 criteria for MDD ( $n=72$  mild,  $n=70$  moderate, and  $n=74$  severe MDD). Prior to  
7 commencing lesson 1, 54% of the patients (162/299) reported some level of suicidal ideation  
8 on question 9 of the PHQ-9: 30% (91/299) had thought about it for several days in the past  
9 two weeks, 15% (45/299) thought about it more than half the days and 9% (26/299)  
10 indicated that they thought about suicide nearly every day.

11  
12  
13  
14  
15  
16  
17 *Post-treatment outcomes:* From pre- to post-treatment there was a significant reduction in  
18 PHQ-9 scores [ $t(298) = 18.1, p < .001$ ], with PHQ-9 scores reducing by 6.2 points on  
19 average [S.D. = 5.9;  $d = 0.98$  (95% CI: )]. A multivariate linear regression controlling for  
20 baseline PHQ-9 scores indicated that age and gender were not statistically significant  
21 predictors of post-treatment PHQ-9 scores. The reduction in suicidal ideation was  
22 considerable and evident at all frequencies, with only 30% (90/299) reporting suicidal  
23 ideation at lesson 6 (see Figure). A Wilcoxin signed-rank test showed a statistically  
24 significant change in suicidal ideation ( $Z = -7.9, p < 0.001, r = 0.5$ ) as measured by question 9  
25 on the PHQ-9, with median scores of 1 (“several days”) pre-intervention and 0 (“not at all”)  
26 post-intervention. A multinomial logistic regression controlling for baseline suicidal ideation  
27 scores indicated that age and gender were not statistically significant predictors of post-  
28 intervention suicidal ideation scores. Patient reported a median of 1 (range 0-2) clinician  
29 contacts during the course.

30  
31  
32  
33  
34  
35  
36  
37  
38  
39  
40  
41  
42  
43  
44  
45  
46  
47  
48  
49  
50  
51  
52  
53  
54  
55  
56  
57  
58  
59  
60  
<Insert Table and Figure here>

## Discussion

Suicidal ideation was common (54%) amongst primary care patients prescribed treatment for depression but dropped to 30% post treatment despite minimal clinician contact and the absence of an intervention focused on suicidal ideation. This reduction in suicidal ideation was evident regardless of sex and age. To our knowledge, this is the first study to show that an internet CBT course for depression reduces suicidal ideation.

The benefits in reducing suicidal ideas are clear. Suicidal behaviour lies on a continuum from thoughts, through intent and planning, to attempt. In the general population it has been

1  
2  
3 shown that 34% of people with ideas develop suicidal plans, and that these plans lead to  
4 suicide attempts in 72% of cases (15, 21). That is, 1 in 4 people who report suicidal ideation  
5 will transition to a suicide attempt, most within the first year of ideation onset (21). Suicide  
6 attempts are significant predictors of subsequent completed suicide. Suicidal ideas are  
7 distressing and dangerous, and therefore an important target for treatment.  
8  
9  
10

11  
12  
13 We have conducted two randomised controlled trials of our iCBT program for depression (1,  
14 2). In the first trial, 33% of applicants were excluded due to suicidal ideation. In the second,  
15 23% were excluded due to suicidal ideation. Based on the current results it is now difficult to  
16 justify excluding patients from clinical trials on the basis of their high suicidal ideation  
17 scores when internet CBT can reduce them quickly and effectively.  
18  
19  
20  
21

22 *Limitations:* Whilst the item from the PHQ-9 assessed the presence and frequency of suicidal  
23 ideation, it did not assess the intensity of the ideation, controllability, intention to act on  
24 thoughts, nor suicide plans or means. Evidence is also needed to understand whether the  
25 changes in suicidal ideation observed in this study are sustained over time. In addition, there  
26 was no control sample, meaning that treatment effects could be attributable to regression to  
27 the mean, spontaneous remission or placebo effects, rather than the intervention *per se*. The  
28 fact that benefits were observed amongst patients at different levels of baseline risk indicates  
29 that regression to the mean may not underlie treatment effects. However, it is not possible to  
30 fully examine the influence of these alternative factors on the outcomes of interest. It was  
31 also not possible to establish whether treatment effects were sustained over time due to the  
32 lack of follow up data. Finally, the lack of formal exclusion criteria means that patients may  
33 have been using adjunctive treatments which contributed to the magnitude of treatment  
34 effects. Whilst the limitations outlined above may be critical within the context of an  
35 efficacy trial, they are endemic to effectiveness research.  
36  
37  
38  
39  
40  
41  
42  
43  
44  
45

46 *Conclusion:* Both suicidal ideation and depressive symptomatology were reduced  
47 considerably following completion of a six lesson iCBT course for depression. This is the  
48 first study to demonstrate these benefits in primary care. At present, it is routine to exclude  
49 patients with frequent suicidal ideation from participating in iCBT. This study provides  
50 evidence for change.  
51  
52  
53  
54  
55  
56  
57  
58  
59  
60

### Contributors

SW drafted the initial manuscript, prepared and cleaned the data, and conducted initial data analysis. LM and JN conducted further statistical analysis. GA supervised [and took responsibility for the data](#)~~the trial~~. All four authors contributed to revised ~~paper~~ drafts.

For peer review only



## References

1. Perini S, Titov N, Andrews G. Clinician-assisted Internet-based treatment is effective for depression: randomized controlled trial. *Australasian Psychiatry*. 2009;43(6):571-8.
2. Titov N, Andrews G, Davies M, et al. Internet treatment for depression: a randomized controlled trial comparing clinician vs. technician assistance. *PloS one*. 2010;5(6):e10939.
3. Johansson R, Sjöberg E, Sjögren M, et al. Tailored vs. Standardized Internet-Based Cognitive Behavior Therapy for Depression and Comorbid Symptoms: A Randomized Controlled Trial. *PloS one*. 2012;7(5):e36905.
4. Kessler RC, Berglund P, Borges G, et al. Trends in suicide ideation, plans, gestures, and attempts in the United States, 1990-1992 to 2001-2003. *JAMA: The Journal of the American Medical Association*. 2005;293(20):2487-95.
5. Goldsmith SK. *Reducing suicide: A national imperative*: Joseph Henry Pr; 2002.
6. Mann JJ, Apter A, Bertolote J, et al. Suicide prevention strategies. *JAMA: The Journal of the American Medical Association*. 2005;294(16):2064-74.
7. Evans K, Tyrer P, Catalan J, et al. Manual-assisted cognitive-behavior therapy (MACT): A randomized controlled trial of a brief intervention with bibliotherapy in the treatment of recurrent deliberate self-harm. *Psychological Medicine*. 1999;29(19-25).
8. Hawton K, Bancroft J, Catalan J, et al. Domiciliary and out-patient treatment of self-poisoning patients by medical and non-medical staff. *Psychological medicine*. 1981;11(01):169-77.
9. Hawton K, Townsend E, Arensman E, et al. Psychosocial and pharmacological treatments for deliberate self harm. *Cochrane Database of Systematic Reviews*. 1999;4.
10. Liberman RP, Eckman T. Behavior therapy vs insight-oriented therapy for repeated suicide attempters. *Archives of general psychiatry*. 1981;38(10):1126.
11. McLeavey BC, Daly RJ, Ludgate JW, et al. Interpersonal Problem-Solving Skills Training in the Treatment of Self-Poisoning Patients. *Suicide and Life-Threatening Behavior*. 1994;24(4):382-94.
12. Patsiokas AT, Clum GA. Effects of psychotherapeutic strategies in the treatment of suicide attempters. *Psychotherapy: Theory, Research, Practice, Training*. 1985;22(2):281.
13. Salkovskis PM, Atha C, Storer D. Cognitive-behavioural problem solving in the treatment of patients who repeatedly attempt suicide. A controlled trial. *The British Journal of Psychiatry*. 1990;157(6):871-6.
14. Sande R, Buskens E, Allart E, et al. Psychosocial intervention following suicide attempt: a systematic review of treatment interventions. *Acta psychiatrica scandinavica*. 1997;96(1):43-50.
15. TARRIER N, Taylor K, Gooding P. Cognitive-behavioral interventions to reduce suicide behavior. *Behavior Modification*. 2008;32(1):77-108.
16. Sunderland M, Wong N, Hilvert-Bruce Z, et al. Investigating trajectories of change in psychological distress amongst patients with depression and generalised anxiety disorder treated with internet cognitive behavioural therapy. *Behaviour Research and Therapy*. 2012.
17. Hilvert-Bruce Z, Rossouw PJ, Wong N, et al. Adherence as a determinant of effectiveness of internet cognitive behavioural therapy for anxiety and depressive disorders. *Behaviour Research and Therapy*. 2012.
18. Kroenke K, Spitzer RL, Williams JBW. The PHQ-9: Validity of a brief depression severity measure. *Journal of General Internal Medicine*. 2001;16(9):606-13.
19. Kroenke K, Spitzer RL, Williams JBW, et al. The Patient Health Questionnaire somatic, anxiety, and depressive symptom scales: a systematic review. *General Hospital Psychiatry*. 2010;32(4):345-59.

- 1  
2  
3 20. Titov N, Dear BF, McMillan D, et al. Psychometric Comparison of the PHQ-9 and  
4 BDI-II for Measuring Response during Treatment of Depression. *Cognitive Behaviour*  
5 *Therapy*. 2011;40(2):126-36.  
6 21. Kessler RC, Borges G, Walters EE. Prevalence of and risk factors for lifetime suicide  
7 attempts in the National Comorbidity Survey. *Archives of general psychiatry*.  
8 1999;56(7):617.  
9  
10  
11  
12  
13  
14  
15  
16  
17  
18  
19  
20  
21  
22  
23  
24  
25  
26  
27  
28  
29  
30  
31  
32  
33  
34  
35  
36  
37  
38  
39  
40  
41  
42  
43  
44  
45  
46  
47  
48  
49  
50  
51  
52  
53  
54  
55  
56  
57  
58  
59  
60

1  
2  
3  
4  
5  
6  
7  
8  
9  
10  
11  
12  
13  
14  
15  
16  
17  
18  
19  
20  
21  
22  
23  
24  
25  
26  
27  
28  
29  
30  
31  
32  
33  
34  
35  
36  
37  
38  
39  
40  
41  
42  
43  
44  
45  
46  
47  
48  
49  
50  
51  
52  
53  
54  
55  
56  
57  
58  
59  
60

|                               | Not at all  | Several days | More than half the days | Nearly every day |
|-------------------------------|-------------|--------------|-------------------------|------------------|
| Pre-intervention PHQ-9 score  | 137 (45.8%) | 91 (30.4%)   | 45 (15.15%)             | 26 (8.7%)        |
| Post-intervention PHQ-9 score | 209 (69.9%) | 66 (22.1%)   | 14 (4.7%)               | 10 (3.3%)        |

For peer review only

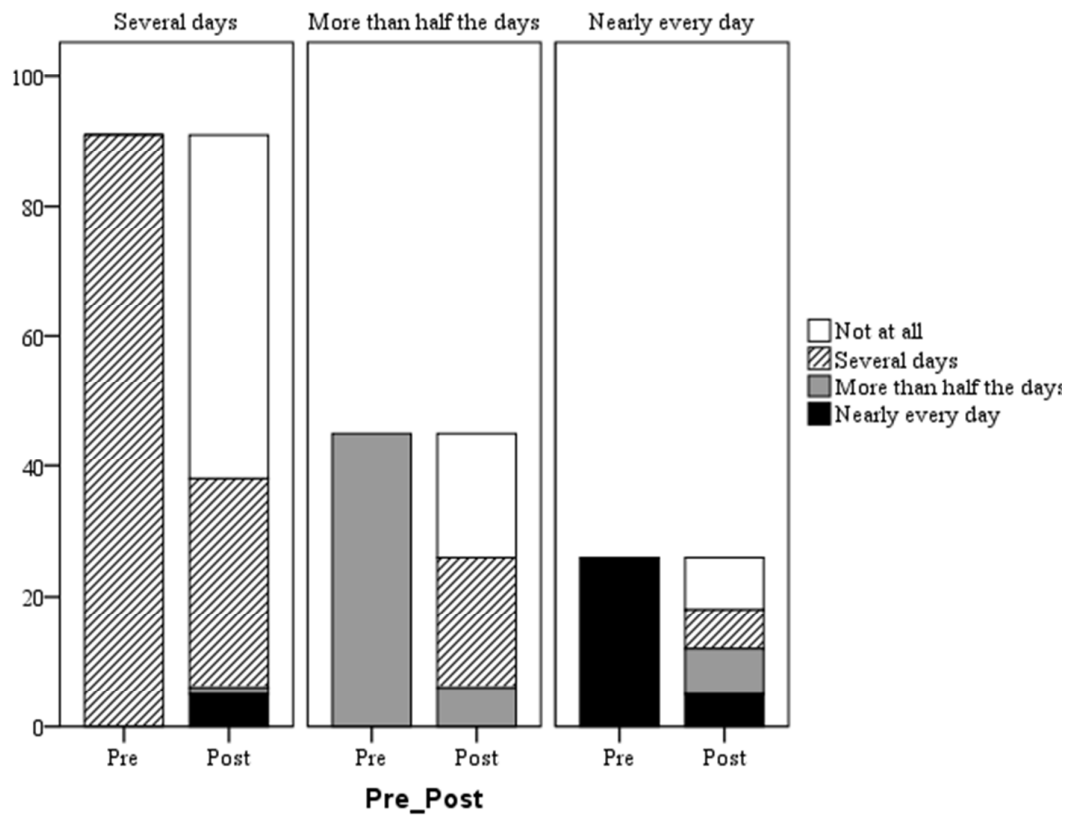

Figure. Frequency of suicidal thoughts (number of patients) before and after treatment for depression.

Review only

# Please wait...

If this message is not eventually replaced by the proper contents of the document, your PDF viewer may not be able to display this type of document.

You can upgrade to the latest version of Adobe Reader for Windows®, Mac, or Linux® by visiting [http://www.adobe.com/go/reader\\_download](http://www.adobe.com/go/reader_download).

For more assistance with Adobe Reader visit <http://www.adobe.com/go/acrreader>.

Windows is either a registered trademark or a trademark of Microsoft Corporation in the United States and/or other countries. Mac is a trademark of Apple Inc., registered in the United States and other countries. Linux is the registered trademark of Linus Torvalds in the U.S. and other countries.

# Please wait...

If this message is not eventually replaced by the proper contents of the document, your PDF viewer may not be able to display this type of document.

You can upgrade to the latest version of Adobe Reader for Windows®, Mac, or Linux® by visiting [http://www.adobe.com/go/reader\\_download](http://www.adobe.com/go/reader_download).

For more assistance with Adobe Reader visit <http://www.adobe.com/go/acrreader>.

Windows is either a registered trademark or a trademark of Microsoft Corporation in the United States and/or other countries. Mac is a trademark of Apple Inc., registered in the United States and other countries. Linux is the registered trademark of Linus Torvalds in the U.S. and other countries.

# Please wait...

If this message is not eventually replaced by the proper contents of the document, your PDF viewer may not be able to display this type of document.

You can upgrade to the latest version of Adobe Reader for Windows®, Mac, or Linux® by visiting [http://www.adobe.com/go/reader\\_download](http://www.adobe.com/go/reader_download).

For more assistance with Adobe Reader visit <http://www.adobe.com/go/acrreader>.

Windows is either a registered trademark or a trademark of Microsoft Corporation in the United States and/or other countries. Mac is a trademark of Apple Inc., registered in the United States and other countries. Linux is the registered trademark of Linus Torvalds in the U.S. and other countries.

**SQUIRE Guidelines**  
**(Standards for Quality Improvement Reporting Excellence)**  
**Final revision – 4-29-08**

- These guidelines provide a framework for reporting formal, planned studies designed to assess the nature and effectiveness of interventions to improve the quality and safety of care.
- It may not be possible to include information about every numbered guideline item in reports of original formal studies, but authors should at least consider every item in writing their reports.
- Although each major section (i.e., Introduction, Methods, Results, and Discussion) of a published original study generally contains some information about the numbered items within that section, information about items from one section (for example, the Introduction) is often also needed in other sections (for example, the Discussion).

| <i>Text section; Item number and name</i> | <i>Section or Item description</i>                                                                                                                                                                                                                                                                                                                                                                                |
|-------------------------------------------|-------------------------------------------------------------------------------------------------------------------------------------------------------------------------------------------------------------------------------------------------------------------------------------------------------------------------------------------------------------------------------------------------------------------|
| <b><u>Title and abstract</u></b>          | <i>Did you provide clear and accurate information for finding, indexing, and scanning your paper?</i>                                                                                                                                                                                                                                                                                                             |
| <b>1. Title</b>                           | <ul style="list-style-type: none"> <li>a. Indicates the article concerns the improvement of quality (broadly defined to include the safety, effectiveness, patient-centeredness, timeliness, efficiency, and equity of care)</li> <li>b. States the specific aim of the intervention</li> <li>c. Specifies the study method used (for example, “A qualitative study,” or “A randomized cluster trial”)</li> </ul> |
| <b>2. Abstract</b>                        | Summarizes precisely all key information from various sections of the text using the abstract format of the intended publication                                                                                                                                                                                                                                                                                  |
| <b><u>Introduction</u></b>                | <i>Why did you start?</i>                                                                                                                                                                                                                                                                                                                                                                                         |
| <b>3. Background Knowledge</b>            | Provides a brief, non-selective summary of current knowledge of the care problem being addressed, and characteristics of organizations in which it occurs                                                                                                                                                                                                                                                         |
| <b>4. Local problem</b>                   | Describes the nature and severity of the specific local problem or system dysfunction that was addressed                                                                                                                                                                                                                                                                                                          |
| <b>5. Intended improvement</b>            | <ul style="list-style-type: none"> <li>a. Describes the specific aim (changes/improvements in care processes and patient outcomes) of the proposed intervention</li> <li>b. Specifies who (champions, supporters) and what (events, observations) triggered the decision to make changes, and why now (timing)</li> </ul>                                                                                         |
| <b>6. Study question</b>                  | States precisely the primary improvement-related question and any secondary questions that the study of the intervention was designed to answer                                                                                                                                                                                                                                                                   |
| <b><u>Methods</u></b>                     | <i>What did you do?</i>                                                                                                                                                                                                                                                                                                                                                                                           |
| <b>7. Ethical issues</b>                  | Describes ethical aspects of implementing and studying the improvement, such as privacy concerns, protection of participants’ physical well-being, and potential author conflicts of interest, and how ethical concerns were addressed                                                                                                                                                                            |
| <b>8. Setting</b>                         | Specifies how elements of the local care environment considered most likely to influence change/improvement in the involved site or sites were identified and characterized                                                                                                                                                                                                                                       |
| <b>9. Planning the intervention</b>       | <ul style="list-style-type: none"> <li>a. Describes the intervention and its component parts in sufficient detail that others could reproduce it</li> <li>b. Indicates main factors that contributed to choice of the specific intervention (for example, analysis of causes of dysfunction; matching relevant improvement experience of others with the local situation)</li> </ul>                              |



| <b>Text section; Item number and name</b>         | <b>Section or Item description</b>                                                                                                                                                                                                                                                                                                                                                                                                                                                                                                                                                                                                                                                                                                                                                                                                                                                                                                                                                                                                                                                                                                                                                            |
|---------------------------------------------------|-----------------------------------------------------------------------------------------------------------------------------------------------------------------------------------------------------------------------------------------------------------------------------------------------------------------------------------------------------------------------------------------------------------------------------------------------------------------------------------------------------------------------------------------------------------------------------------------------------------------------------------------------------------------------------------------------------------------------------------------------------------------------------------------------------------------------------------------------------------------------------------------------------------------------------------------------------------------------------------------------------------------------------------------------------------------------------------------------------------------------------------------------------------------------------------------------|
| <b>Planning the intervention (continued)</b>      | c. Outlines initial plans for how the intervention was to be implemented: e.g., <i>what</i> was to be done (initial steps; functions to be accomplished by those steps; how tests of change would be used to modify intervention), and <i>by whom</i> (intended roles, qualifications, and training of staff)                                                                                                                                                                                                                                                                                                                                                                                                                                                                                                                                                                                                                                                                                                                                                                                                                                                                                 |
| <b>10. Planning the study of the intervention</b> | a. Outlines plans for assessing how well the intervention was implemented (dose or intensity of exposure)<br>b. Describes mechanisms by which intervention components were expected to cause changes, and plans for testing whether those mechanisms were effective<br>c. Identifies the study design (for example, observational, quasi-experimental, experimental) chosen for measuring impact of the intervention on primary and secondary outcomes, if applicable<br>d. Explains plans for implementing essential aspects of the chosen study design, as described in publication guidelines for specific designs, if applicable (see, for example, <a href="http://www.equator-network.org">www.equator-network.org</a> )<br>e. Describes aspects of the study design that specifically concerned internal validity (integrity of the data) and external validity (generalizability)                                                                                                                                                                                                                                                                                                     |
| <b>11. Methods of evaluation</b>                  | a. Describes instruments and procedures (qualitative, quantitative, or mixed) used to assess a) the effectiveness of implementation, b) the contributions of intervention components and context factors to effectiveness of the intervention, and c) primary and secondary outcomes<br>b. Reports efforts to validate and test reliability of assessment instruments<br>c. Explains methods used to assure data quality and adequacy (for example, blinding; repeating measurements and data extraction; training in data collection; collection of sufficient baseline measurements)                                                                                                                                                                                                                                                                                                                                                                                                                                                                                                                                                                                                        |
| <b>12. Analysis</b>                               | a. Provides details of qualitative and quantitative (statistical) methods used to draw inferences from the data<br>b. Aligns unit of analysis with level at which the intervention was implemented, if applicable<br>c. Specifies degree of variability expected in implementation, change expected in primary outcome (effect size), and ability of study design (including size) to detect such effects<br>d. Describes analytic methods used to demonstrate effects of time as a variable (for example, statistical process control)                                                                                                                                                                                                                                                                                                                                                                                                                                                                                                                                                                                                                                                       |
| <b>Results</b>                                    | <i>What did you find?</i>                                                                                                                                                                                                                                                                                                                                                                                                                                                                                                                                                                                                                                                                                                                                                                                                                                                                                                                                                                                                                                                                                                                                                                     |
| <b>13. Outcomes</b>                               | a) Nature of setting and improvement intervention<br>i. Characterizes relevant elements of setting or settings (for example, geography, physical resources, organizational culture, history of change efforts), and structures and patterns of care (for example, staffing, leadership) that provided context for the intervention<br>ii. Explains the actual course of the intervention (for example, sequence of steps, events or phases; type and number of participants at key points), preferably using a time-line diagram or flow chart<br>iii. Documents degree of success in implementing intervention components<br>iv. Describes how and why the initial plan evolved, and the most important lessons learned from that evolution, particularly the effects of internal feedback from tests of change (reflexiveness)<br>b) Changes in processes of care and patient outcomes associated with the intervention<br>i. Presents data on changes observed in the care delivery process<br>ii. Presents data on changes observed in measures of patient outcome (for example, morbidity, mortality, function, patient/staff satisfaction, service utilization, cost, care disparities) |

| <b><i>Text section; Item number and name</i></b> | <b><i>Section or Item description</i></b>                                                                                                                                                                                                                                                                                                                                                                                                                                                                                                                                                                                                                                                                                                                                                                                              |
|--------------------------------------------------|----------------------------------------------------------------------------------------------------------------------------------------------------------------------------------------------------------------------------------------------------------------------------------------------------------------------------------------------------------------------------------------------------------------------------------------------------------------------------------------------------------------------------------------------------------------------------------------------------------------------------------------------------------------------------------------------------------------------------------------------------------------------------------------------------------------------------------------|
| <b>Outcomes (continued)</b>                      | <ul style="list-style-type: none"> <li>iii. Considers benefits, harms, unexpected results, problems, failures</li> <li>iv. Presents evidence regarding the strength of association between observed changes/improvements and intervention components/context factors</li> <li>v. Includes summary of missing data for intervention and outcomes</li> </ul>                                                                                                                                                                                                                                                                                                                                                                                                                                                                             |
| <b><u>Discussion</u></b>                         | <i>What do the findings mean?</i>                                                                                                                                                                                                                                                                                                                                                                                                                                                                                                                                                                                                                                                                                                                                                                                                      |
| <b>14. Summary</b>                               | <ul style="list-style-type: none"> <li>a. Summarizes the most important successes and difficulties in implementing intervention components, and main changes observed in care delivery and clinical outcomes</li> <li>b. Highlights the study's particular strengths</li> </ul>                                                                                                                                                                                                                                                                                                                                                                                                                                                                                                                                                        |
| <b>15. Relation to other evidence</b>            | Compares and contrasts study results with relevant findings of others, drawing on broad review of the literature; use of a summary table may be helpful in building on existing evidence                                                                                                                                                                                                                                                                                                                                                                                                                                                                                                                                                                                                                                               |
| <b>16. Limitations</b>                           | <ul style="list-style-type: none"> <li>a. Considers possible sources of confounding, bias, or imprecision in design, measurement, and analysis that might have affected study outcomes (internal validity)</li> <li>b. Explores factors that could affect generalizability (external validity), for example: representativeness of participants; effectiveness of implementation; dose-response effects; features of local care setting</li> <li>c. Addresses likelihood that observed gains may weaken over time, and describes plans, if any, for monitoring and maintaining improvement; explicitly states if such planning was not done</li> <li>d. Reviews efforts made to minimize and adjust for study limitations</li> <li>e. Assesses the effect of study limitations on interpretation and application of results</li> </ul> |
| <b>17. Interpretation</b>                        | <ul style="list-style-type: none"> <li>a. Explores possible reasons for differences between observed and expected outcomes</li> <li>b. Draws inferences consistent with the strength of the data about causal mechanisms and size of observed changes, paying particular attention to components of the intervention and context factors that helped determine the intervention's effectiveness (or lack thereof), and types of settings in which this intervention is most likely to be effective</li> <li>c. Suggests steps that might be modified to improve future performance</li> <li>d. Reviews issues of opportunity cost and actual financial cost of the intervention</li> </ul>                                                                                                                                             |
| <b>18. Conclusions</b>                           | <ul style="list-style-type: none"> <li>a. Considers overall practical usefulness of the intervention</li> <li>b. Suggests implications of this report for further studies of improvement interventions</li> </ul>                                                                                                                                                                                                                                                                                                                                                                                                                                                                                                                                                                                                                      |
| <b><u>Other information</u></b>                  | <i>Were other factors relevant to conduct and interpretation of the study?</i>                                                                                                                                                                                                                                                                                                                                                                                                                                                                                                                                                                                                                                                                                                                                                         |
| <b>19. Funding</b>                               | Describes funding sources, if any, and role of funding organization in design, implementation, interpretation, and publication of study                                                                                                                                                                                                                                                                                                                                                                                                                                                                                                                                                                                                                                                                                                |

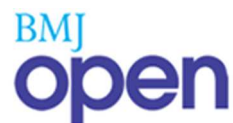

**A clinical audit of changes in suicide ideas with internet treatment for depression.**

|                                 |                                                                                                                                                                                                                                                                                                                                                                                                |
|---------------------------------|------------------------------------------------------------------------------------------------------------------------------------------------------------------------------------------------------------------------------------------------------------------------------------------------------------------------------------------------------------------------------------------------|
| Journal:                        | <i>BMJ Open</i>                                                                                                                                                                                                                                                                                                                                                                                |
| Manuscript ID:                  | bmjopen-2012-001558.R2                                                                                                                                                                                                                                                                                                                                                                         |
| Article Type:                   | Research                                                                                                                                                                                                                                                                                                                                                                                       |
| Date Submitted by the Author:   | 07-Aug-2012                                                                                                                                                                                                                                                                                                                                                                                    |
| Complete List of Authors:       | Watts, Sarah; St Vincents Hospital, Clinical Research Unit for Anxiety and Depression<br>Newby, Jill; University of New South Wales, Clinical Research Unit for Anxiety and Depression<br>Mewton, Louise; University of New South Wales, Clinical Research Unit for Anxiety and Depression<br>Andrews, Gavin; University of New South Wales, Clinical Research Unit for Anxiety and Depression |
| <b>Primary Subject Heading</b>: | Evidence based practice                                                                                                                                                                                                                                                                                                                                                                        |
| Secondary Subject Heading:      | Mental health, Health services research                                                                                                                                                                                                                                                                                                                                                        |
| Keywords:                       | MENTAL HEALTH, PRIMARY CARE, PSYCHIATRY, Depression & mood disorders < PSYCHIATRY                                                                                                                                                                                                                                                                                                              |
|                                 |                                                                                                                                                                                                                                                                                                                                                                                                |

SCHOLARONE™  
Manuscripts

1  
2  
3  
4 **A clinical audit of changes in suicide ideas with internet treatment for depression.**  
5  
6  
7

8 Sarah Watts<sup>1</sup>  
9

10 Jill M. Newby<sup>1</sup>  
11

12 Louise Mewton<sup>1,2</sup>  
13

14 Gavin Andrews<sup>1</sup>  
15  
16  
17  
18  
19  
20  
21

- 22 1. Clinical Research Unit for Anxiety and Depression, School of Psychiatry, University of New  
23 South Wales at St Vincent's Hospital, Darlinghurst, NSW, Australia.  
24  
25 2. Corresponding author.  
26  
27  
28  
29

30 **Competing interests**  
31

32 None declared  
33  
34  
35

36 **Funding**  
37

38 Ms Watts and Dr Newby were supported by the Australian Government Department of  
39 Health and Ageing. Dr Mewton was supported by an Australian National Health and  
40 Medical Research Council Capacity Building Grant.  
41  
42  
43  
44  
45  
46  
47  
48  
49  
50  
51  
52  
53  
54  
55  
56  
57  
58  
59  
60

## Abstract

**Objectives:** To examine reductions in suicidal ideation amongst a sample of patients who were prescribed an internet CBT course for depression. **Design:** Effectiveness study within a quality assurance framework. **Setting:** Primary care. **Participants:** 299 patients who were prescribed an internet CBT (iCBT) course for depression by primary care clinicians.

**Intervention:** 6 lesson, fully automated cognitive behaviour therapy course delivered over the internet. Primary outcome: suicidal ideation as measured by question 9 on the Patient Health Questionnaire (PHQ-9). **Results:** Suicidal ideation was common (54%) amongst primary care patients prescribed iCBT treatment for depression but dropped to 30% post treatment despite minimal clinician contact and the absence of an intervention focused on suicidal ideation. This reduction in suicidal ideation was evident regardless of sex and age.

**Conclusions:** The findings do not support the exclusion of patients with significant suicidal ideation.

## Article summary

### *Article focus*

- The reduction of suicidal ideation amongst patients treated for depression using internet cognitive behaviour therapy in clinical practice

### *Key messages*

- Suicidal ideation is common amongst primary care patients prescribed internet CBT for depression
- After treatment with internet CBT, suicidal ideation decreased significantly
- The continued exclusion of these patients from research studies and internet CBT is no longer justified.

### *Strengths and limitations*

- Evidence is needed to see if the changes in suicidal ideation is sustained over time

1  
2  
3 Patients who say they feel they would be 'better off dead' worry clinicians and, for that  
4 matter, research ethics committees approving depression trials, especially trials over the  
5 internet. As a consequence, patients reporting suicidal ideas are often excluded from internet  
6 treatment trials (1-3). Given that suicidal thoughts are an integral part of depression we  
7 sought data to provide a rational basis for inclusion/exclusion of people with suicidal ideas.  
8  
9

10  
11  
12 Rates of suicide can be reduced through treatment of depression or reduction in access to the  
13 means for suicide (4-6). The efficacy of cognitive behavioural therapy (CBT) in treating  
14 depression has been established. Suicidal ideas and attempts decrease, commensurate with  
15 reductions in depressive symptomatology (7-15). These studies have all been conducted  
16 within a clinical trial framework amongst depressed patients selected for their high suicide  
17 risk. To our knowledge, there is currently no evidence regarding the effectiveness of CBT or  
18 internet CBT (iCBT) in reducing suicidal ideation in the depressed patient seeking treatment  
19 in primary care, and no data to inform inclusion/exclusion criteria in clinical trials.  
20  
21  
22  
23  
24  
25

26  
27 We have previously reported from two randomized controlled trials that the progress of  
28 patients receiving the internet CBT course used in this study was significantly better than the  
29 progress of a waitlist control group (1, 2). We have also reported from quality assurance  
30 studies that when these courses were used routinely by primary care clinicians that  
31 effectiveness was comparable to the efficacy and that adherence rates of 60% could be  
32 achieved (16, 17). The aim of the current quality assurance study is to examine reductions in  
33 suicidal ideation amongst a sample of patients who were prescribed an internet CBT course  
34 for depression by primary care clinicians.  
35  
36  
37  
38  
39  
40

## 41 **Method**

42  
43 *Sample:* Primary care physicians prescribed the internet depression course for patients they  
44 deemed suitable (1). They were advised to exclude people who were 'actively suicidal'. As  
45 part of a routine quality assurance exercise we analysed the progress of the 299 primary care  
46 patients who completed the six lesson iCBT depression course between April 2009 and May  
47 2011 (1). Data gathered was confined to measures used as a routine to inform practitioners  
48 about the progress of their patients. All patients agreed that their pooled data could be used  
49 for quality assurance purposes. This paper was written as part of the Quality Assurance  
50 activities of St Vincent's Hospital with whom the draft of the paper was lodged prior to  
51 submission.  
52  
53  
54  
55  
56  
57  
58  
59  
60

1  
2  
3 *Intervention:* The iCBT depression course consists of six lessons covering psycho-education,  
4 behavioural activation, cognitive restructuring, problem solving, graded exposure and  
5 relapse prevention (1, 2). Content is presented in the form of an illustrated story in which the  
6 character gains mastery over their depressive symptoms. At the end of each illustrated  
7 lesson the patient downloads “homework,” comprising a summary of the lesson content, and  
8 activities to be completed that translate the skills learnt in the lesson to their own lives.  
9 Automatic emails are also sent congratulating patients when they complete lessons.  
10 Clinicians are advised to contact patients at least twice during the course.  
11  
12  
13  
14  
15  
16

17 *Outcome measures:* The Patient Health Questionnaire (PHQ-9) is a brief 9-item measure of  
18 depression severity (18). The nine items assess DSM-IV Criterion A for major depressive  
19 disorder (MDD). Patients rate each item in terms of the frequency of symptoms over the  
20 past two weeks, on a 4-point scale (0= not at all, 1= several days, 2 = more than half of the  
21 days, 3= nearly every day). Scores can range from 0 to 27, with higher levels representing  
22 higher symptom severity. Cut points for MDD have been established as follows: 0-9 = well  
23 or sub-threshold, 10-14 = mild, 15-19 = moderate, and 20-27 = severe depression (19).  
24 Suicidal ideation was measured by question nine from the PHQ-9 which asks about the  
25 frequency of suicidal ideation (“thoughts that you would be better off dead, or of hurting  
26 yourself in some way”) in the previous two weeks using the above 4 point scale. The PHQ-9  
27 has been shown to demonstrate adequate reliability, convergent/discriminant validity, and  
28 responsiveness to change in previous studies of iCBT (20), with a Cronbach’s alpha of 0.89  
29 in the current sample.  
30  
31  
32  
33  
34  
35  
36  
37  
38  
39

40 *Statistical Analysis:* Changes in participants’ PHQ-9 scores from pre- to post-treatment were  
41 analysed using a paired samples t-test. Multivariate linear regression controlling for baseline  
42 PHQ-9 scores was used to investigate the effect of sex and age on post-treatment PHQ-9  
43 scores. A Wilcoxon signed-rank test was used to analyse differences in suicidal ideation in  
44 response to treatment. Multinomial logistic regression controlling for baseline suicidality  
45 investigated the effect of sex and age on post-treatment suicidal ideation. An alpha of .05  
46 was used to test statistical significance.  
47  
48  
49  
50  
51

## 52 **Results**

53  
54  
55 *Baseline characteristics:* The mean age of the 299 patients who completed the 6 lesson  
56 course was 43 years, 56% female. The mean baseline PHQ-9 score was 14.3 with 83  
57  
58  
59  
60



patients scoring 0-9 (well or subthreshold MDD), and 216 scoring 10-27 and likely to meet criteria for MDD ( $n=72$  mild,  $n=70$  moderate, and  $n=74$  severe MDD). Prior to commencing lesson 1, 54% of the patients (162/299) reported some level of suicidal ideation on question 9 of the PHQ-9: 30% (91/299) had thought about it for several days in the past two weeks, 15% (45/299) thought about it more than half the days and 9% (26/299) indicated that they thought about suicide nearly every day.

*Post-treatment outcomes:* From pre- to post-treatment there was a significant reduction in PHQ-9 scores [ $t(298) = 18.1, p < .001$ ], with PHQ-9 scores reducing by 6.2 points on average [S.D. = 5.9;  $d = 0.98$  (95% CI: )]. A multivariate linear regression controlling for baseline PHQ-9 scores indicated that age and gender were not statistically significant predictors of post-treatment PHQ-9 scores. The reduction in suicidal ideation was considerable and evident at all frequencies, with only 30% (90/299) reporting suicidal ideation at lesson 6 (see Figure). A Wilcoxin signed-rank test showed a statistically significant change in suicidal ideation ( $Z = -7.9, p < 0.001, r = 0.5$ ) as measured by question 9 on the PHQ-9, with median scores of 1 (“several days”) pre-intervention and 0 (“not at all”) post-intervention. A multinomial logistic regression controlling for baseline suicidal ideation scores indicated that age and gender were not statistically significant predictors of post-intervention suicidal ideation scores. Patient reported a median of 1 (range 0-2) clinician contacts during the course.

Table 1

|                               | Not at all  | Several days | More than half the days | Nearly every day |
|-------------------------------|-------------|--------------|-------------------------|------------------|
| Pre-intervention PHQ-9 score  | 137 (45.8%) | 91 (30.4%)   | 45 (15.15%)             | 26 (8.7%)        |
| Post-intervention PHQ-9 score | 209 (69.9%) | 66 (22.1%)   | 14 (4.7%)               | 10 (3.3%)        |

## Discussion

Suicidal ideation was common (54%) amongst primary care patients prescribed treatment for depression but dropped to 30% post treatment despite minimal clinician contact and the absence of an intervention focused on suicidal ideation. This reduction in suicidal ideation



1  
2  
3 was evident regardless of sex and age. To our knowledge, this is the first study to document  
4 an association between iCBT for depression and reductions in suicidal ideation.  
5  
6

7  
8 The benefits in reducing suicidal ideas are clear. Suicidal behaviour lies on a continuum  
9 from thoughts, through intent and planning, to attempt. In the general population it has been  
10 shown that 34% of people with ideas develop suicidal plans, and that these plans lead to  
11 suicide attempts in 72% of cases (15, 21). That is, 1 in 4 people who report suicidal ideation  
12 will transition to a suicide attempt, most within the first year of ideation onset (21). Suicide  
13 attempts are significant predictors of subsequent completed suicide. Suicidal ideas are  
14 distressing and dangerous, and therefore an important target for treatment.  
15  
16  
17  
18  
19

20  
21 We have conducted two randomised controlled trials of our iCBT program for depression (1,  
22 2). In the first trial, 33% of applicants were excluded due to suicidal ideation. In the second,  
23 23% were excluded due to suicidal ideation. Based on the current results it is now difficult to  
24 justify excluding patients from clinical trials on the basis of their high suicidal ideation  
25 scores when internet CBT can reduce them quickly and effectively.  
26  
27  
28  
29

30  
31 *Limitations:* Whilst the item from the PHQ-9 assessed the presence and frequency of suicidal  
32 ideation, it did not assess the intensity of the ideation, controllability, intention to act on  
33 thoughts, nor suicide plans or means. Evidence is also needed to understand whether the  
34 changes in suicidal ideation observed in this study are sustained over time. In addition, there  
35 was no control sample, meaning that treatment effects could be attributable to regression to  
36 the mean, spontaneous remission or placebo effects, rather than the intervention *per se*. The  
37 fact that benefits were observed amongst patients at different levels of baseline risk indicates  
38 that regression to the mean may not underlie treatment effects. However, it is not possible to  
39 fully examine the influence of these alternative factors on the outcomes of interest. It was  
40 also not possible to establish whether treatment effects were sustained over time due to the  
41 lack of follow up data. Finally, the lack of formal exclusion criteria means that patients may  
42 have been using adjunctive treatments which contributed to the magnitude of treatment  
43 effects. Whilst the limitations outlined above may be critical within the context of an  
44 efficacy trial, they are endemic to effectiveness research.  
45  
46  
47  
48  
49  
50  
51  
52  
53  
54

55 *Conclusion:* Both suicidal ideation and depressive symptomatology were reduced  
56 considerably following completion of a six lesson iCBT course for depression. This is the  
57  
58  
59  
60

1  
2  
3 first study to demonstrate this association in primary care. At present, it is routine to exclude  
4 patients with frequent suicidal ideation from participating in iCBT. This study provides  
5 evidence for change.  
6  
7  
8  
9  
10

### 11 12 13 14 **Contributors**

15  
16  
17 SW drafted the initial manuscript, prepared and cleaned the data, and conducted initial data  
18 analysis. LM and JN conducted further statistical analysis. GA supervised and took  
19 responsibility for the data. All four authors contributed to revised drafts.  
20  
21  
22

### 23 **Data Sharing Statement**

24  
25 No additional data available  
26  
27  
28  
29  
30  
31  
32  
33  
34  
35  
36  
37  
38  
39  
40  
41  
42  
43  
44  
45  
46  
47  
48  
49  
50  
51  
52  
53  
54  
55  
56  
57  
58  
59  
60

## References

1. Perini S, Titov N, Andrews G. Clinician-assisted Internet-based treatment is effective for depression: randomized controlled trial. *Australasian Psychiatry*. 2009;43(6):571-8.
2. Titov N, Andrews G, Davies M, et al. Internet treatment for depression: a randomized controlled trial comparing clinician vs. technician assistance. *PloS one*. 2010;5(6):e10939.
3. Johansson R, Sjöberg E, Sjögren M, et al. Tailored vs. Standardized Internet-Based Cognitive Behavior Therapy for Depression and Comorbid Symptoms: A Randomized Controlled Trial. *PloS one*. 2012;7(5):e36905.
4. Kessler RC, Berglund P, Borges G, et al. Trends in suicide ideation, plans, gestures, and attempts in the United States, 1990-1992 to 2001-2003. *JAMA: The Journal of the American Medical Association*. 2005;293(20):2487-95.
5. Goldsmith SK. *Reducing suicide: A national imperative*: Joseph Henry Pr; 2002.
6. Mann JJ, Apter A, Bertolote J, et al. Suicide prevention strategies. *JAMA: The Journal of the American Medical Association*. 2005;294(16):2064-74.
7. Evans K, Tyrer P, Catalan J, et al. Manual-assisted cognitive-behavior therapy (MACT): A randomized controlled trial of a brief intervention with bibliotherapy in the treatment of recurrent deliberate self-harm. *Psychological Medicine*. 1999;29(19-25).
8. Hawton K, Bancroft J, Catalan J, et al. Domiciliary and out-patient treatment of self-poisoning patients by medical and non-medical staff. *Psychological medicine*. 1981;11(01):169-77.
9. Hawton K, Townsend E, Arensman E, et al. Psychosocial and pharmacological treatments for deliberate self harm. *Cochrane Database of Systematic Reviews*. 1999;4.
10. Liberman RP, Eckman T. Behavior therapy vs insight-oriented therapy for repeated suicide attempters. *Archives of general psychiatry*. 1981;38(10):1126.
11. McLeavey BC, Daly RJ, Ludgate JW, et al. Interpersonal Problem-Solving Skills Training in the Treatment of Self-Poisoning Patients. *Suicide and Life-Threatening Behavior*. 1994;24(4):382-94.
12. Patsiokas AT, Clum GA. Effects of psychotherapeutic strategies in the treatment of suicide attempters. *Psychotherapy: Theory, Research, Practice, Training*. 1985;22(2):281.
13. Salkovskis PM, Atha C, Storer D. Cognitive-behavioural problem solving in the treatment of patients who repeatedly attempt suicide. A controlled trial. *The British Journal of Psychiatry*. 1990;157(6):871-6.
14. Sande R, Buskens E, Allart E, et al. Psychosocial intervention following suicide attempt: a systematic review of treatment interventions. *Acta psychiatrica scandinavica*. 1997;96(1):43-50.

- 1
- 2
- 3 15. Tarrier N, Taylor K, Gooding P. Cognitive-behavioral interventions to reduce suicide
- 4 behavior. *Behavior Modification*. 2008;32(1):77-108.
- 5 16. Sunderland M, Wong N, Hilvert-Bruce Z, et al. Investigating trajectories of change in
- 6 psychological distress amongst patients with depression and generalised anxiety disorder
- 7 treated with internet cognitive behavioural therapy. *Behaviour Research and Therapy*. 2012.
- 8 17. Hilvert-Bruce Z, Rossouw PJ, Wong N, et al. Adherence as a determinant of
- 9 effectiveness of internet cognitive behavioural therapy for anxiety and depressive disorders.
- 10 *Behaviour Research and Therapy*. 2012.
- 11 18. Kroenke K, Spitzer RL, Williams JBW. The PHQ-9: Validity of a brief depression
- 12 severity measure. *Journal of General Internal Medicine*. 2001;16(9):606-13.
- 13 19. Kroenke K, Spitzer RL, Williams JBW, et al. The Patient Health Questionnaire
- 14 somatic, anxiety, and depressive symptom scales: a systematic review. *General Hospital*
- 15 *Psychiatry*. 2010;32(4):345-59.
- 16 20. Titov N, Dear BF, McMillan D, et al. Psychometric Comparison of the PHQ-9 and
- 17 BDI-II for Measuring Response during Treatment of Depression. *Cognitive Behaviour*
- 18 *Therapy*. 2011;40(2):126-36.
- 19 21. Kessler RC, Borges G, Walters EE. Prevalence of and risk factors for lifetime suicide
- 20 attempts in the National Comorbidity Survey. *Archives of general psychiatry*.
- 21 1999;56(7):617.
- 22
- 23
- 24
- 25
- 26
- 27
- 28
- 29
- 30
- 31
- 32
- 33
- 34
- 35
- 36
- 37
- 38
- 39
- 40
- 41
- 42
- 43
- 44
- 45
- 46
- 47
- 48
- 49
- 50
- 51
- 52
- 53
- 54
- 55
- 56
- 57
- 58
- 59
- 60

1  
2  
3  
4  
5  
6  
7  
8  
9  
10  
11  
12  
13  
14  
15  
16  
17  
18  
19  
20  
21  
22  
23  
24  
25  
26  
27  
28  
29  
30  
31  
32  
33  
34  
35  
36  
37  
38  
39  
40  
41  
42  
43  
44  
45  
46  
47  
48  
49  
50  
51  
52  
53  
54  
55  
56  
57  
58  
59  
60

**A clinical audit of changes in suicide ideas with internet treatment for depression.**  
**Reductions in suicidality after internet cognitive behaviour therapy for depression.**

Sarah Watts<sup>1</sup>

Jill M. Newby<sup>1</sup>

Louise Mewton<sup>1,2</sup>

Gavin Andrews<sup>1</sup>

1. Clinical Research Unit for Anxiety and Depression, School of Psychiatry, University of New South Wales at St Vincent's Hospital, Darlinghurst, NSW, Australia.
2. Corresponding author.

**Competing interests**

None declared

**Funding**

Ms Watts and Dr Newby were supported by the Australian Government Department of Health and Ageing. Dr Mewton was supported by an Australian National Health and Medical Research Council Capacity Building Grant.

## Abstract

Objectives: To examine reductions in suicidal ideation amongst a sample of patients who were prescribed an internet CBT course for depression. Design: Effectiveness study within a quality assurance framework. Setting: Primary care. Participants: 299 patients who were prescribed an internet CBT (iCBT) course for depression by primary care clinicians.

Intervention: 6 lesson, fully automated cognitive behaviour therapy course delivered over the internet. Primary outcome: suicidal ideation as measured by question 9 on the Patient Health Questionnaire (PHQ-9). Results: Suicidal ideation was common (54%) amongst primary care patients prescribed iCBT treatment for depression but dropped to 30% post treatment despite minimal clinician contact and the absence of an intervention focused on suicidal ideation.

This reduction in suicidal ideation was evident regardless of sex and age. Conclusions: The findings do not support the exclusion of patients with significant suicidal ideation.

## Article summary

### *Article focus*

- The reduction of suicidal ideation amongst patients treated for depression using internet cognitive behaviour therapy in clinical practice

### *Key messages*

- Suicidal ideation is common amongst primary care patients prescribed internet CBT for depression
- After treatment with internet CBT, suicidal ideation decreased significantly
- The continued exclusion of these patients from research studies and internet CBT is no longer justified.

### *Strengths and limitations*

- Evidence is needed to see if the changes in suicidal ideation is sustained over time

1  
2  
3 Patients who say they feel they would be 'better off dead' worry clinicians and, for that  
4 matter, research ethics committees approving depression trials, especially trials over the  
5 internet. As a consequence, patients reporting suicidal ideas are often excluded from internet  
6 treatment trials (1-3). Given that suicidal thoughts are an integral part of depression we  
7 sought data to provide a rational basis for inclusion/exclusion of people with suicidal ideas.  
8  
9

10  
11  
12 Rates of suicide can be reduced through treatment of depression or reduction in access to the  
13 means for suicide (4-6). The efficacy of cognitive behavioural therapy (CBT) in treating  
14 depression has been established. Suicidal ideas and attempts decrease, commensurate with  
15 reductions in depressive symptomatology (7-15). These studies have all been conducted  
16 within a clinical trial framework amongst depressed patients selected for their high suicide  
17 risk. To our knowledge, there is currently no evidence regarding the effectiveness of CBT or  
18 internet CBT (iCBT) in reducing suicidal ideation in the depressed patient seeking treatment  
19 in primary care, and no data to inform inclusion/exclusion criteria in clinical trials.  
20  
21

22  
23  
24 We have previously reported from two randomized controlled trials that the progress of  
25 patients receiving the internet CBT course used in this study was significantly better than the  
26 progress of a waitlist control group (1, 2). We have also reported from quality assurance  
27 studies that when these courses were used routinely by primary care clinicians that  
28 effectiveness was comparable to the efficacy and that adherence rates of 60% could be  
29 achieved (16, 17). The aim of the current quality assurance study is to examine reductions in  
30 suicidal ideation amongst a sample of patients who were prescribed an internet CBT course  
31 for depression by primary care clinicians.  
32  
33

## 34 35 36 37 38 39 40 41 **Method**

42  
43  
44 *Sample:* Primary care physicians prescribed the internet depression course for patients they  
45 deemed suitable (1). They were advised to exclude people who were 'actively suicidal'. As  
46 part of a routine quality assurance exercise we analysed the progress of the 299 primary care  
47 patients who completed the six lesson iCBT depression course between April 2009 and May  
48 2011 (1). Data gathered was confined to measures used as a routine to inform practitioners  
49 about the progress of their patients. All patients agreed that their pooled data could be used  
50 for quality assurance purposes. This paper was written as part of the Quality Assurance  
51 activities of St Vincent's Hospital with whom the draft of the paper was lodged prior to  
52 submission.  
53  
54  
55  
56  
57  
58  
59  
60

1  
2  
3 *Intervention:* The iCBT depression course consists of six lessons covering psycho-education,  
4 behavioural activation, cognitive restructuring, problem solving, graded exposure and  
5 relapse prevention (1, 2). Content is presented in the form of an illustrated story in which the  
6 character gains mastery over their depressive symptoms. At the end of each illustrated  
7 lesson the patient downloads “homework,” comprising a summary of the lesson content, and  
8 activities to be completed that translate the skills learnt in the lesson to their own lives.  
9 Automatic emails are also sent congratulating patients when they complete lessons.  
10 Clinicians are advised to contact patients at least twice during the course.  
11  
12

13  
14  
15  
16  
17 *Outcome measures:* The Patient Health Questionnaire (PHQ-9) is a brief 9-item measure of  
18 depression severity (18). The nine items assess DSM-IV Criterion A for major depressive  
19 disorder (MDD). Patients rate each item in terms of the frequency of symptoms over the  
20 past two weeks, on a 4-point scale (0= not at all, 1= several days, 2 = more than half of the  
21 days, 3= nearly every day). Scores can range from 0 to 27, with higher levels representing  
22 higher symptom severity. Cut points for MDD have been established as follows: 0-9 = well  
23 or sub-threshold, 10-14 = mild, 15-19 = moderate, and 20-27 = severe depression (19).  
24 Suicidal ideation was measured by question nine from the PHQ-9 which asks about the  
25 frequency of suicidal ideation (“thoughts that you would be better off dead, or of hurting  
26 yourself in some way”) in the previous two weeks using the above 4 point scale. The PHQ-9  
27 has been shown to demonstrate adequate reliability, convergent/discriminant validity, and  
28 responsiveness to change in previous studies of iCBT (20), with a Cronbach’s alpha of 0.89  
29 in the current sample.  
30  
31  
32  
33  
34  
35  
36  
37  
38  
39

40 *Statistical Analysis:* Changes in participants’ PHQ-9 scores from pre- to post-treatment were  
41 analysed using a paired samples t-test. Multivariate linear regression controlling for baseline  
42 PHQ-9 scores was used to investigate the effect of sex and age on post-treatment PHQ-9  
43 scores. A Wilcoxon signed-rank test was used to analyse differences in suicidal ideation in  
44 response to treatment. Multinomial logistic regression controlling for baseline suicidality  
45 investigated the effect of sex and age on post-treatment suicidal ideation. An alpha of .05  
46 was used to test statistical significance.  
47  
48  
49  
50  
51

## 52 **Results**

53  
54  
55 *Baseline characteristics:* The mean age of the 299 patients who completed the 6 lesson  
56 course was 43 years, 56% female. The mean baseline PHQ-9 score was 14.3 with 83  
57  
58  
59  
60



1  
2  
3 patients scoring 0-9 (well or subthreshold MDD), and 216 scoring 10-27 and likely to meet  
4 criteria for MDD ( $n=72$  mild,  $n=70$  moderate, and  $n=74$  severe MDD). Prior to  
5 commencing lesson 1, 54% of the patients (162/299) reported some level of suicidal ideation  
6 on question 9 of the PHQ-9: 30% (91/299) had thought about it for several days in the past  
7 two weeks, 15% (45/299) thought about it more than half the days and 9% (26/299)  
8 indicated that they thought about suicide nearly every day.  
9  
10  
11  
12

13  
14 *Post-treatment outcomes:* From pre- to post-treatment there was a significant reduction in  
15 PHQ-9 scores [ $t(298) = 18.1, p < .001$ ], with PHQ-9 scores reducing by 6.2 points on  
16 average [S.D. = 5.9;  $d = 0.98$  (95% CI: )]. A multivariate linear regression controlling for  
17 baseline PHQ-9 scores indicated that age and gender were not statistically significant  
18 predictors of post-treatment PHQ-9 scores. The reduction in suicidal ideation was  
19 considerable and evident at all frequencies, with only 30% (90/299) reporting suicidal  
20 ideation at lesson 6 (see Figure). A Wilcoxin signed-rank test showed a statistically  
21 significant change in suicidal ideation ( $Z = -7.9, p < 0.001, r = 0.5$ ) as measured by question 9  
22 on the PHQ-9, with median scores of 1 (“several days”) pre-intervention and 0 (“not at all”)  
23 post-intervention. A multinomial logistic regression controlling for baseline suicidal ideation  
24 scores indicated that age and gender were not statistically significant predictors of post-  
25 intervention suicidal ideation scores. Patient reported a median of 1 (range 0-2) clinician  
26 contacts during the course.  
27  
28  
29  
30  
31  
32  
33  
34  
35  
36

37 <Insert Table and Figure here>  
38  
39

## 40 Discussion

41  
42 Suicidal ideation was common (54%) amongst primary care patients prescribed treatment for  
43 depression but dropped to 30% post treatment despite minimal clinician contact and the  
44 absence of an intervention focused on suicidal ideation. This reduction in suicidal ideation  
45 was evident regardless of sex and age. To our knowledge, this is the first study to ~~show that~~  
46 an internet CBT course for depression reduces suicidal ideation document an association  
47 between iCBT for depression and reductions in suicidal ideation.  
48  
49  
50  
51  
52

53  
54 The benefits in reducing suicidal ideas are clear. Suicidal behaviour lies on a continuum  
55 from thoughts, through intent and planning, to attempt. In the general population it has been  
56 shown that 34% of people with ideas develop suicidal plans, and that these plans lead to  
57  
58  
59  
60

1  
2  
3 suicide attempts in 72% of cases (15, 21). That is, 1 in 4 people who report suicidal ideation  
4 will transition to a suicide attempt, most within the first year of ideation onset (21). Suicide  
5 attempts are significant predictors of subsequent completed suicide. Suicidal ideas are  
6 distressing and dangerous, and therefore an important target for treatment.  
7  
8  
9

10  
11 We have conducted two randomised controlled trials of our iCBT program for depression (1,  
12 2). In the first trial, 33% of applicants were excluded due to suicidal ideation. In the second,  
13 23% were excluded due to suicidal ideation. Based on the current results it is now difficult to  
14 justify excluding patients from clinical trials on the basis of their high suicidal ideation  
15 scores when internet CBT can reduce them quickly and effectively.  
16  
17  
18  
19

20  
21 *Limitations:* Whilst the item from the PHQ-9 assessed the presence and frequency of suicidal  
22 ideation, it did not assess the intensity of the ideation, controllability, intention to act on  
23 thoughts, nor suicide plans or means. Evidence is also needed to understand whether the  
24 changes in suicidal ideation observed in this study are sustained over time. In addition, there  
25 was no control sample, meaning that treatment effects could be attributable to regression to  
26 the mean, spontaneous remission or placebo effects, rather than the intervention *per se*. The  
27 fact that benefits were observed amongst patients at different levels of baseline risk indicates  
28 that regression to the mean may not underlie treatment effects. However, it is not possible to  
29 fully examine the influence of these alternative factors on the outcomes of interest. It was  
30 also not possible to establish whether treatment effects were sustained over time due to the  
31 lack of follow up data. Finally, the lack of formal exclusion criteria means that patients may  
32 have been using adjunctive treatments which contributed to the magnitude of treatment  
33 effects. Whilst the limitations outlined above may be critical within the context of an  
34 efficacy trial, they are endemic to effectiveness research.  
35  
36  
37  
38  
39  
40  
41  
42  
43  
44

45 *Conclusion:* Both suicidal ideation and depressive symptomatology were reduced  
46 considerably following completion of a six lesson iCBT course for depression. This is the  
47 first study to demonstrate ~~these benefits~~this association in primary care. At present, it is  
48 routine to exclude patients with frequent suicidal ideation from participating in iCBT. This  
49 study provides evidence for change.  
50  
51  
52  
53  
54  
55  
56  
57  
58  
59  
60

## Contributors

SW drafted the initial manuscript, prepared and cleaned the data, and conducted initial data analysis. LM and JN conducted further statistical analysis. GA supervised and took responsibility for the data. All four authors contributed to revised drafts.

For peer review only

## References

1. Perini S, Titov N, Andrews G. Clinician-assisted Internet-based treatment is effective for depression: randomized controlled trial. *Australasian Psychiatry*. 2009;43(6):571-8.
2. Titov N, Andrews G, Davies M, et al. Internet treatment for depression: a randomized controlled trial comparing clinician vs. technician assistance. *PloS one*. 2010;5(6):e10939.
3. Johansson R, Sjöberg E, Sjögren M, et al. Tailored vs. Standardized Internet-Based Cognitive Behavior Therapy for Depression and Comorbid Symptoms: A Randomized Controlled Trial. *PloS one*. 2012;7(5):e36905.
4. Kessler RC, Berglund P, Borges G, et al. Trends in suicide ideation, plans, gestures, and attempts in the United States, 1990-1992 to 2001-2003. *JAMA: The Journal of the American Medical Association*. 2005;293(20):2487-95.
5. Goldsmith SK. *Reducing suicide: A national imperative*: Joseph Henry Pr; 2002.
6. Mann JJ, Apter A, Bertolote J, et al. Suicide prevention strategies. *JAMA: The Journal of the American Medical Association*. 2005;294(16):2064-74.
7. Evans K, Tyrer P, Catalan J, et al. Manual-assisted cognitive-behavior therapy (MACT): A randomized controlled trial of a brief intervention with bibliotherapy in the treatment of recurrent deliberate self-harm. *Psychological Medicine*. 1999;29(19-25).
8. Hawton K, Bancroft J, Catalan J, et al. Domiciliary and out-patient treatment of self-poisoning patients by medical and non-medical staff. *Psychological medicine*. 1981;11(01):169-77.
9. Hawton K, Townsend E, Arensman E, et al. Psychosocial and pharmacological treatments for deliberate self harm. *Cochrane Database of Systematic Reviews*. 1999;4.
10. Liberman RP, Eckman T. Behavior therapy vs insight-oriented therapy for repeated suicide attempters. *Archives of general psychiatry*. 1981;38(10):1126.
11. McLeavey BC, Daly RJ, Ludgate JW, et al. Interpersonal Problem-Solving Skills Training in the Treatment of Self-Poisoning Patients. *Suicide and Life-Threatening Behavior*. 1994;24(4):382-94.
12. Patsiokas AT, Clum GA. Effects of psychotherapeutic strategies in the treatment of suicide attempters. *Psychotherapy: Theory, Research, Practice, Training*. 1985;22(2):281.
13. Salkovskis PM, Atha C, Storer D. Cognitive-behavioural problem solving in the treatment of patients who repeatedly attempt suicide. A controlled trial. *The British Journal of Psychiatry*. 1990;157(6):871-6.
14. Sande R, Buskens E, Allart E, et al. Psychosocial intervention following suicide attempt: a systematic review of treatment interventions. *Acta psychiatrica scandinavica*. 1997;96(1):43-50.
15. TARRIER N, Taylor K, Gooding P. Cognitive-behavioral interventions to reduce suicide behavior. *Behavior Modification*. 2008;32(1):77-108.
16. Sunderland M, Wong N, Hilvert-Bruce Z, et al. Investigating trajectories of change in psychological distress amongst patients with depression and generalised anxiety disorder treated with internet cognitive behavioural therapy. *Behaviour Research and Therapy*. 2012.
17. Hilvert-Bruce Z, Rossouw PJ, Wong N, et al. Adherence as a determinant of effectiveness of internet cognitive behavioural therapy for anxiety and depressive disorders. *Behaviour Research and Therapy*. 2012.
18. Kroenke K, Spitzer RL, Williams JBW. The PHQ-9: Validity of a brief depression severity measure. *Journal of General Internal Medicine*. 2001;16(9):606-13.
19. Kroenke K, Spitzer RL, Williams JBW, et al. The Patient Health Questionnaire somatic, anxiety, and depressive symptom scales: a systematic review. *General Hospital Psychiatry*. 2010;32(4):345-59.

- 1  
2  
3 20. Titov N, Dear BF, McMillan D, et al. Psychometric Comparison of the PHQ-9 and  
4 BDI-II for Measuring Response during Treatment of Depression. *Cognitive Behaviour*  
5 *Therapy*. 2011;40(2):126-36.  
6 21. Kessler RC, Borges G, Walters EE. Prevalence of and risk factors for lifetime suicide  
7 attempts in the National Comorbidity Survey. *Archives of general psychiatry*.  
8 1999;56(7):617.  
9  
10  
11  
12  
13  
14  
15  
16  
17  
18  
19  
20  
21  
22  
23  
24  
25  
26  
27  
28  
29  
30  
31  
32  
33  
34  
35  
36  
37  
38  
39  
40  
41  
42  
43  
44  
45  
46  
47  
48  
49  
50  
51  
52  
53  
54  
55  
56  
57  
58  
59  
60

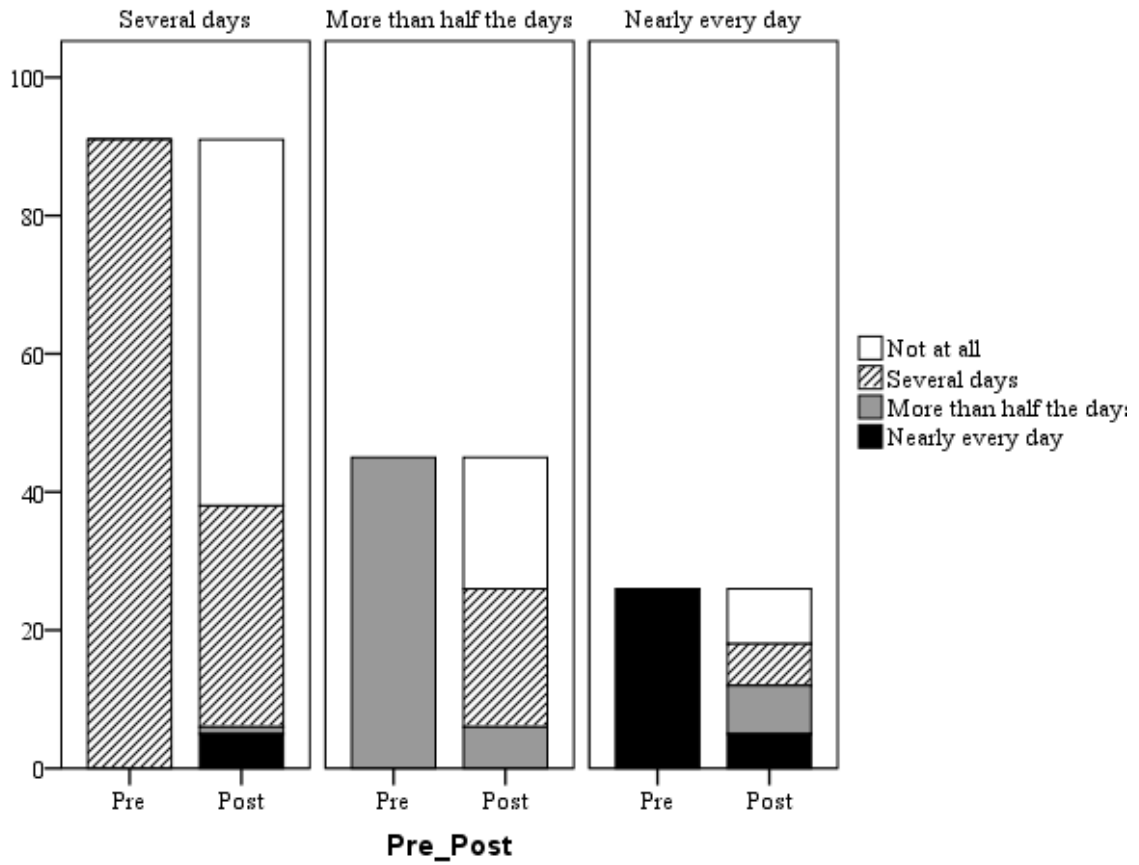

Figure. Frequency of suicidal thoughts (number of patients) before and after treatment for depression.

Review only
